# Supplementary material for: Efficacy and Safety of Filgrastim and Its Biosimilars to Prevent Febrile Neutropenia in Cancer Patients: A Prospective Study and Meta-Analysis
Source: MDPI journal article supplement (doi:10.3390/biology10101069), 2021-10-19
Supplement: s1 [file s1]

## Supplementary

**Table S1.** Full electronic search in MEDLINE database through July 31st, 2020.

| Research | Query                                                   | Items Found |
|----------|---------------------------------------------------------|-------------|
| 1        | Neupogen                                                | 906         |
| 2        | filgrastim                                              | 891         |
| 3        | granulocyte colony-stimulating factor                   | 4823        |
| 4        | G-CSF                                                   | 5202        |
| 5        | GCSF                                                    | 2183        |
| 6        | recombinant human granulocyte colony stimulating factor | 1801        |
| 7        | rhG-CSF                                                 | 226         |
| 8        | rhGCSF                                                  | 230         |
| 9        | r-met-HUG-CSF                                           | 2           |
| 10       | r-metHuG-CSF                                            | 898         |
| 11       | hematopoietic growth factor                             | 6851        |
| 12       | 1 or 2                                                  | 906         |
| 13       | 3 or 4 or 5 or 6                                        | 3831        |
| 14       | 7 or 8                                                  | 233         |
| 15       | 9 or 10                                                 | 39          |
| 16       | 12 or 13 or 14 or 15 or 11                              | 7973        |

**Table S2.** Key characteristics of included studies of Filgrastim versus Placebo/ No treatment.

| Author; Year                                  | Study Design              | Cancer Type                                                                                   | Cancer Stage | Country | Patients (N)                                                                                                                              | Patient age                                                                          | Sex (M/F)                                                                                                                              | Chemotherapy regimen       | Treatment Group                                                                             | Intervention dose; Route |
|-----------------------------------------------|---------------------------|-----------------------------------------------------------------------------------------------|--------------|---------|-------------------------------------------------------------------------------------------------------------------------------------------|--------------------------------------------------------------------------------------|----------------------------------------------------------------------------------------------------------------------------------------|----------------------------|---------------------------------------------------------------------------------------------|--------------------------|
| <b>Chemotherapy-Induced Neutropenia (CIN)</b> |                           |                                                                                               |              |         |                                                                                                                                           |                                                                                      |                                                                                                                                        |                            |                                                                                             |                          |
| Chen <i>et al</i> ; 2017                      | Observation<br>al; NA; NA | Colorectal<br>cancer                                                                          | NA           | China   | N= 100<br>Filgrastim: n = 50<br>Placebo: n= 50                                                                                            | Median age (range)<br>Filgrastim: 57 (25-77)<br>Placebo: 58 (27-75)                  | Filgrastim: 30/20<br>Placebo: 29/21                                                                                                    | NA                         | Filgrastim vs. Placebo                                                                      | 150 µg/day; S.C          |
| Altwaigi <i>et al</i> ; 2013                  | Observation<br>al; NA; NA | Breast<br>Cancer                                                                              | NA           | Canada  | N = 239<br>PP G-CSF (filgrastim or pegfilgrastim) = 145<br>No PP G-CSF (secondary G-CSF or no G-CSF) = 94                                 | Median (range)<br>55 (32–80)                                                         | 0/239                                                                                                                                  | Trastuzu mab and docetaxel | PP G-CSF (filgrastim or pegfilgrastim) vs. No PP G-CSF (secondary G-CSF or no G-CSF)        | NA                       |
| Hershman <i>et al</i> ; 2009                  | Observation<br>al; NA; NA | Breast<br>Cancer,<br>lung cancer,<br>ovarian<br>cancer, or<br>colon<br>cancer, or<br>lymphoma | NA           | USA     | N = 3123<br>PP G-CSF (filgrastim or pegfilgrastim) = 822<br>No PP G-CSF (delayed filgrastim or pegfilgrastim = 1523<br>or no G-CSF = 778) | <65 years: 61% in PP vs 58% in no G-CSF<br>>65 years: 38% in PP vs 41.2% in no G-CSF | PP G-CSF (filgrastim or pegfilgrastim) = 212/610<br>No PP G-CSF (delayed filgrastim or pegfilgrastim = 320/1203 or no G-CSF = 257/521) | Various                    | PP G-CSF (filgrastim or pegfilgrastim) vs. No PP G-CSF (delayed filgrastim or pegfilgrastim | NA                       |

|                               |                    |                |                    |                                    |                                                                                                                                    |                                                                                     |                                                        |                                           |                              |                                                    |
|-------------------------------|--------------------|----------------|--------------------|------------------------------------|------------------------------------------------------------------------------------------------------------------------------------|-------------------------------------------------------------------------------------|--------------------------------------------------------|-------------------------------------------|------------------------------|----------------------------------------------------|
| Blayney <i>et al</i> ; 2005   | NRCT; Phase I; NA  | NSCLC, NHL     | IIIA, IIIB, IV     | USA                                | N= 104<br>NSCLC (n= 55):<br>Filgrastim: n = 46<br>No filgrastim: n= 9<br>NHL (n= 49):<br>Filgrastim: n = 44<br>No filgrastim: n= 5 | Median (range)<br>NSCLC (n= 55): 59 (39-79)<br>NHL (n= 49): 53 (28-73)              | NSCLC<br>Filgrastim: 29/17<br>NHL<br>Filgrastim: 26/18 | NSCLC: etoposide , cisplatin<br>NHL: CHOP | Filgrastim vs. No Filgrastim | NSCLC trial: 5µg/kg/day<br>NHL trial: 5 µg/kg/day; |
| Crawford <i>et al</i> ; 2005  | RCT; Phase III; DB | SCLC           | Limited/ extensive | USA                                | N= 231<br>Filgrastim: n = 111<br>Placebo: n= 120                                                                                   | Mean age (range ± SD)<br>Filgrastim: 61.2 (31-78 ±9.7)<br>Placebo: 62 (33- 80 ±8.6) | Filgrastim: 70/41<br>Placebo: 79/41                    | CDE                                       | Filgrastim vs. Placebo       | 5 µg/kg/day; S.C.                                  |
| Doorduijn <i>et al</i> ; 2003 | RCT; Phase III; NA | Aggressive NHL | II/ III/ IV        | Dutch, The Netherl and, Belgium    | N= 389<br>Filgrastim: n = 197<br>Placebo: n= 192                                                                                   | Mean age ± SD<br>Filgrastim: 73 ± 5<br>Placebo: 73 ± 5                              | Filgrastim: 107/90<br>Placebo: 109/83                  | CHOP                                      | Filgrastim vs. Placebo       | 300 µg/day; S.C.                                   |
| Osby <i>et al</i> ; 2003      | RCT; NA; OL        | Aggressive NHL | II/ III/ IV        | Sweden, Norway , Denmar k, Finland | N= 455<br>Filgrastim: n = 226<br>Placebo: n= 229                                                                                   | Median age 71 (60-86)                                                               | NA                                                     | CHOP; CNOP                                | Filgrastim vs. Placebo       | 5 µg/kg/day; S.C.                                  |
| Papaldo <i>et al</i> ; 2003   | RCT; NA;OL         | Breast Cancer  | I/II               | Italy                              | N= 503<br>Filgrastim: n = 254<br>No Filgrastim: n= 249                                                                             | Median (range) 45 (25-65)                                                           | NA                                                     | AC                                        | Filgrastim vs. No Filgrastim | 300- 480 µg/day; S.C.                              |

|                              |                           |                                 |             |                                                                      |                                                           |                                                                        |                                                |                                                         |                                          |                                |
|------------------------------|---------------------------|---------------------------------|-------------|----------------------------------------------------------------------|-----------------------------------------------------------|------------------------------------------------------------------------|------------------------------------------------|---------------------------------------------------------|------------------------------------------|--------------------------------|
| Gilad <i>et al</i> ; 1999    | Observation<br>al; NA; NA | Solid<br>tumors or<br>lymphoma  | NA          | Israel                                                               | N= 209 (1079 cycles)<br>PP filgrastim = 66<br>No PP= 1013 | Median (range) 55 (19-88)                                              | Filgrastim: 10/55<br>No Filgrastim:<br>258/755 | Various                                                 | PP filgrastim<br>vs. No PP<br>filgrastim | 3-5 µm/kg of<br>body wt.; S.C. |
| Fossa <i>et al</i> ; 1998    | RCT; Phase<br>III; OL     | GCM                             | IV          | UK,<br>Norway<br>,<br>Hungar<br>y, The<br>Netherl<br>and,<br>Belgium | N= 259<br>Filgrastim: n = 129<br>No Filgrastim: n= 130    | Median age 28 (15-65)                                                  | NA                                             | BEP/EP                                                  | Filgrastim vs.<br>No Filgrastim          | 5 µg/kg/day;<br>S.C.           |
| Larson <i>et al</i> ; 1998   | RCT; NA; OL               | ALL                             | NA          | USA                                                                  | N= 198<br>Filgrastim: n = 102<br>Placebo: n= 96           | Median (range)<br>35 (16-79)                                           | NA                                             | Intensive<br>remission<br>induction<br>chemothe<br>rapy | Filgrastim vs.<br>Placebo                | 5 µg/kg/day;<br>S.C.           |
| Michon <i>et al</i> ; 1998   | RCT; Phase<br>II; OL      | Metastatic<br>Neuroblast<br>oma | IV          | France                                                               | N= 59<br>Filgrastim: n = 31<br>Placebo: n= 28             | median (range)<br>Filgrastim: 3 (1-10)<br>Placebo: 3 (1-13)            | Filgrastim: 24/7<br>Placebo: 18/10             | VDC; EP                                                 | Filgrastim vs.<br>Placebo                | 5 µg/kg/day;<br>S.C.           |
| Geissler <i>et al</i> ; 1997 | RCT; Phase<br>III; NA     | ALL                             | I,II,III,IV | Australi<br>a                                                        | N= 51<br>Filgrastim: n = 25<br>Placebo: n= 26             | median (range)<br>Filgrastim:36.4 (17-75)<br>Placebo: 41.7 (16-79)     | NA                                             | DVAP                                                    | Filgrastim<br>vs. Placebo                | 5 µg/kg/day;<br>S.C.           |
| Pui <i>et al</i> ; 1997      | RCT; NA; DB               | ALL                             | NA          | USA                                                                  | N= 148<br>Filgrastim: n = 73<br>Placebo: n= 75            | median (range)<br>Filgrastim:5.8 (0.2-17.9)<br>Placebo: 5.7 (1.0-16.9) | Filgrastim: 40/33<br>Placebo: 42/33            | Remissio<br>n<br>induction<br>therapy                   | Filgrastim<br>vs. Placebo                | 10 µg /kg/day;<br>S.C.         |

|                                     |                               |                              |                |                     |                                                       |                                                                       |                                           |                                              |                              |                                 |
|-------------------------------------|-------------------------------|------------------------------|----------------|---------------------|-------------------------------------------------------|-----------------------------------------------------------------------|-------------------------------------------|----------------------------------------------|------------------------------|---------------------------------|
| Zinzani <i>et al</i> ; 1997         | RCT; OL                       | Aggressive NHL               | II/ III/ IV    | Italy               | N= 149<br>Filgrastim: n = 77<br>No filgrastim: n= 72  | median (range)<br>Filgrastim: 69 (60-82)<br>No filgrastim: 70 (60-80) | NA                                        | VNCOP-B                                      | Filgrastim vs. No Filgrastim | 5 mg/kg/day; S.C.               |
| Ottmann; 1995                       | Observation al; Phase III, OL | ALL                          | NA             | Germany             | N= 76<br>Filgrastim: n = 37<br>No filgrastim: n= 39   | median (range)<br>Filgrastim: 27 (16-65)<br>No filgrastim: 30 (16-58) | Filgrastim: 26/11<br>Placebo: 25/14       | Induction chemotherapy                       | Filgrastim vs. No Filgrastim | 5 µg/kg/day; S.C.               |
| Maher <i>et al</i> ; 1994           | RCT; Phase III; DB            | ALL/Lymphoma                 | NA             | Australia           | N= 216<br>Filgrastim: n = 109<br>Placebo: n= 107      | median (range)<br>Filgrastim: 48 (16-81)<br>Placebo: 51 (17-85)       | Filgrastim: 54/55<br>Placebo: 49/58       | Antibiotic therapy                           | Filgrastim vs. Placebo       | 12 µg/kg/day; S.C.              |
| Gebbia <i>et al</i> ; 1993          | Observational ; NA, NA        | Breast Cancer/SCLC/HNC/HC/GC | Advanced       | Italy               | N= 86<br>Filgrastim: n = 43<br>Placebo: n= 43         | mean age (range)<br>Filgrastim: 56 (41-66)<br>Placebo: 58 (38-65)     | Filgrastim: 16/27<br>Placebo: 15/28       | Multiple                                     | Filgrastim vs. Placebo       | 5 µg/kg/day; S.C.               |
| Trillet-Lenoir <i>et al</i> ; 1993  | RCT; Phase III; DB            | SCLC                         | I/ II/ III/ IV | Europe (13 centers) | N= 129<br>Filgrastim: n = 65<br>Placebo: n= 64        | median<br>Filgrastim: 58<br>Placebo: 60                               | Filgrastim: 45/20<br>Placebo: 44/20       | CDE                                          | Filgrastim vs. Placebo       | 230 µg/m <sup>2</sup> /day; S.C |
| Crawford <i>et al</i> ; 1991        | RCT; Phase III; DB            | SCLC                         | I/ II/ III/ IV | USA                 | N= 199<br>Filgrastim: n = 95<br>Placebo: n= 104       | median (range)<br>Filgrastim: 62 (31-78)<br>Placebo: 63 (31-80)       | Filgrastim: 65/35<br>Placebo: 63/37       | CDE                                          | Filgrastim vs. Placebo       | 230 µg/m <sup>2</sup> /day; S.C |
| <b>Acute Myeloid Leukemia (AML)</b> |                               |                              |                |                     |                                                       |                                                                       |                                           |                                              |                              |                                 |
| Beksac <i>et al</i> ; 2011          | RCT; Phase III; NA            | AML                          | NA             | Turkey              | N= 260<br>Filgrastim: n = 123<br>No Filgrastim: n=137 | Median (SD)<br>Filgrastim: 38.9 (13.5)<br>No Filgrastim: 38.3 (14.0)  | Filgrastim: 74/49<br>No Filgrastim: 74/63 | De novo AML induction therapy cytarabine and | Filgrastim vs. No Filgrastim | 5 µg/kg/ day; I.V.              |

|                                |             |     |    |                                                                           |                                                       |                                                                          |                                           |                                                                     |                              |                                  |
|--------------------------------|-------------|-----|----|---------------------------------------------------------------------------|-------------------------------------------------------|--------------------------------------------------------------------------|-------------------------------------------|---------------------------------------------------------------------|------------------------------|----------------------------------|
|                                |             |     |    |                                                                           |                                                       |                                                                          |                                           |                                                                     |                              | idarubicin                       |
|                                |             |     |    |                                                                           |                                                       |                                                                          |                                           |                                                                     |                              | n                                |
| Heil <i>et al</i> ; 2006       | RCT; NA; DB | AML | NA | German y, Spain, Austria, UK, Belgium, Portugal, Sweden, Italy, Australia | N= 521<br>Filgrastim: n = 259<br>Placebo: n= 262      | Median (range)<br>Filgrastim: 54 (16-89)<br>Placebo: 54 (16-88)          | Filgrastim: 141/118<br>Placebo: 142/120   | Standard induction and consolidation chemotherapy                   | Filgrastim vs. Placebo       | 5 µg/kg/ day; S.C.               |
| Usuki <i>et al</i> ; 2002      | RCT; NA     | AML | NA | Japan                                                                     | N= 245<br>Filgrastim: n = 120<br>No Filgrastim: n=125 | Mean (range)<br>Filgrastim: 48.5 (15-75)<br>No Filgrastim: 49.7 (15- 87) | Filgrastim: 80/40<br>No Filgrastim: 78/47 | Induction chemotherapy                                              | Filgrastim vs. No Filgrastim | 200 µg/m <sup>2</sup> /day; S.C. |
| Harousseau <i>et al</i> ; 2000 | RCT; NA     | AML | NA | France                                                                    | N= 194<br>Filgrastim: n = 100<br>No Filgrastim: n=94  | Median (range):<br>Filgrastim: 47.5 (16-60)<br>No Filgrastim: 45 (15-60) | Filgrastim: 49/51<br>No Filgrastim: 47/47 | Consolidation with either high dose cytarabine plus mitoxantrone or | Filgrastim vs. No Filgrastim | 5 µg/kg/ day; S.C.               |

|                            |                       |     |    |                                                                                                   |                                                       |                                                                           |                                     |                                                                  |                                 |                        |  |  |  |
|----------------------------|-----------------------|-----|----|---------------------------------------------------------------------------------------------------|-------------------------------------------------------|---------------------------------------------------------------------------|-------------------------------------|------------------------------------------------------------------|---------------------------------|------------------------|--|--|--|
|                            |                       |     |    |                                                                                                   |                                                       |                                                                           |                                     |                                                                  | amsacrin<br>e plus<br>etoposide |                        |  |  |  |
| Godwin <i>et al</i> ; 1998 | RCT; Phase<br>III, DB | AML | NA | USA                                                                                               | N= 211<br>Filgrastim: n = 106<br>Placebo: n=105       | Median (range)<br>68 (56-88)                                              | Filgrastim: 56/50<br>Placebo: 66/39 | Induction<br>with<br>cytarabin<br>e,<br>daunoru<br>bicin         | Filgrastim vs.<br>Placebo       | 400 µg/m²/day;<br>I.V. |  |  |  |
| Heil <i>et al</i> ; 1997   | RCT; Phase<br>III; DB | AML | NA | German<br>y, Spain,<br>Belgium<br>,<br>Portugal<br>,<br>Sweden,<br>UK,<br>Italy,<br>Australi<br>a | N= 521<br>Filgrastim: n = 259<br>No Filgrastim: n=262 | Median (range)<br>Filgrastim: 54 (16-89)<br>No Filgrastim: 54 (16-<br>88) | NA                                  | Induction<br>therapy<br>with DCE                                 | Filgrastim vs.<br>No Filgrastim | 5 µg/kg/ day;<br>S.C.  |  |  |  |
| Moore <i>et al</i> ; 1997  | NRCT; Phase<br>II; NA | AML | NA | USA                                                                                               | N= 123<br>Filgrastim: n = 61<br>No Filgrastim: n=62   | Median (range)<br>41 (16-59)                                              | 113/136                             | Consolid<br>ation<br>with<br>diaziquo<br>ne,<br>mitoxant<br>rone | Filgrastim vs.<br>No Filgrastim | 5 µg/kg/ day           |  |  |  |

#### Severe Chronic Neutropenia (SCN)

|                                          |                           |                                              |    |        |                                                                           |                                                                                          |                                                                    |    |                                                          |                                                                                                                                                                                   |
|------------------------------------------|---------------------------|----------------------------------------------|----|--------|---------------------------------------------------------------------------|------------------------------------------------------------------------------------------|--------------------------------------------------------------------|----|----------------------------------------------------------|-----------------------------------------------------------------------------------------------------------------------------------------------------------------------------------|
| Yilmaz <i>et al</i> ; 2007               | Observation<br>al; NA; NA | SCN                                          | NA | Turkey | N= 39<br>Filgrastim: n= 16<br>No filgrastim: n= 23                        | Median (range):<br>15 months (3 months<br>to 17 years)                                   | NA                                                                 | NA | Filgrastim vs.<br>No Filgrastim                          | 5 µg/kg/ day                                                                                                                                                                      |
| Dale <i>et al</i> ; 1993                 | RCT; Phase<br>III; NA     | SCN                                          | NA | USA    | N= 123<br>Filgrastim: n= 63<br>4 month observation +<br>filgrastim: n= 60 | Median (range)<br>12.1 (0.6- 75.7)                                                       | Filgrastim: 29/34<br>4 month<br>observation +<br>filgrastim: 27/33 | NA | Filgrastim vs.<br>4 month<br>observation +<br>filgrastim | Idiopathic<br>neutropenia:<br>3.45 µg/kg/ day<br>BID; S.C.<br>Cyclic<br>neutropenia:<br>5.75 µg/kg/day<br>BID; S.C.<br>Congenital<br>neutropenia:<br>11.50 µg/kg/day<br>BID; S.C. |
| <b>Bone Marrow Transplantation (BMT)</b> |                           |                                              |    |        |                                                                           |                                                                                          |                                                                    |    |                                                          |                                                                                                                                                                                   |
| Gertz <i>et al</i> ; 2011                | Observation<br>al; NA; NA | MM                                           | NA | USA    | N= 664<br>Filgrastim: n= 498<br>No filgrastim: n= 166                     | Median (range):<br>Filgrastim: 59.8 (53.0-<br>65.4)<br>No filgrastim: 61 (53.9-<br>66.8) | Filgrastim:<br>290/208<br>No filgrastim:<br>102/64                 | NA | Filgrastim vs.<br>No Filgrastim                          | 5 µg/kg/ day                                                                                                                                                                      |
| Gonzalez-Vicent <i>et al</i> ;<br>2004   | RCT;<br>NA                | NA;<br>leukemia,<br>lymphoma,<br>solid tumor | NA | Spain  | N= 117<br>Filgrastim: n= 51<br>No filgrastim: n= 66                       | Median (range):<br>Filgrastim: 8 (1-18)<br>No filgrastim: 8 (1-18)                       | Filgrastim: 32/19<br>No filgrastim:<br>45/21                       | NA | Filgrastim vs.<br>No Filgrastim                          | 10 µg/kg/ day;<br>S.C.                                                                                                                                                            |
| Damiani <i>et al</i> ; 1997              | Observation<br>al; NA; NA | NHL or HL                                    | NA | Italy  | N= 55<br>Filgrastim primed<br>Bone marrow: n= 36                          | Median (range)                                                                           | Filgrastim<br>primed Bone<br>marrow: 23/13                         | NA | Filgrastim<br>primed Bone<br>marrow                      | 16 µg/kg/ day;<br>S.C.                                                                                                                                                            |



|                            |             |           |    |              |                                                                                  |                                                                                                         |                                                                                  |  |                                                                           |
|----------------------------|-------------|-----------|----|--------------|----------------------------------------------------------------------------------|---------------------------------------------------------------------------------------------------------|----------------------------------------------------------------------------------|--|---------------------------------------------------------------------------|
|                            |             |           |    |              | Filgrastim primed<br>peripheral blood : n= 19                                    | Filgrastim primed<br>Bone marrow: 32 (16-56)                                                            | Filgrastim primed<br>peripheral blood : 10/09                                    |  | vs.Filgrastim primed<br>peripheral blood                                  |
|                            |             |           |    |              |                                                                                  | Filgrastim primed<br>peripheral blood : 41 (22-55)                                                      |                                                                                  |  |                                                                           |
| Stahel <i>et al</i> ; 1997 | RCT; NA; OL | NHL or HL | NA | Switzerl and | N= 86<br>Filgrastim 5 µg/kg/ day:<br>n= 44<br>Filgrastim 10 µg/kg/ day:<br>n= 42 | Median (range)<br>Filgrastim 5 µg/kg/ day:<br>37.5 (16-58)<br>Filgrastim 10 µg/kg/ day:<br>32.5 (16-56) | Filgrastim 5 NA<br>µg/kg/ day:<br>27/17<br>Filgrastim 10<br>µg/kg/ day:<br>26/16 |  | Filgrastim 5 5 or 10 µg/kg/ day vs. day; S.C.<br>Filgrastim 10 µg/kg/ day |

**Abbreviations:** AC= Doxorubicin [or pirarubicin or epirubicin], cyclophosphamide; ALL= Acute lymphoblastic leukemia; AML= Acute myeloid leukemia; BD= Bortezomib and dexamethasone; BEP/EP= Cisplatin, etoposide, bleomycin; BHAC-DM/ BHAC-DMP= behenoyl-cytosine arabinoside, daunorubicin and 6-mercaptopurine, prednisolone; CDE = cyclophosphamide, doxorubicin, etoposide; CHASE (R)= cyclophosphamide, cytarabine, etoposide and dexamethasone± rituximab; CIN= Chemotherapy-Induced Neutropenia; CHOP = Cyclophosphamide, doxorubicin, vincristine, prednisolone; DB = double-blind; DCE= Daunorubicin, cytarabine and etoposide; DD= doxorubicin and docetaxel; DLBCL= Diffuse large B-cell lymphomas; DVAP= daunorubicin, vincristine, L-asparaginase and prednisone; ET= docetaxel, cyclophosphamide; FEC-D= fluorouracil, epirubicin, cyclophosphamide and docetaxel; GCM= Germ cell malignancy; GCSF= Granulocyte colony stimulating factor; HL= Hodgkin's Lymphoma; IC= Idarubicin, cytarabine; IE= etoposide and ifosfamide; I.V. = intravenously; MM= Multiple myeloma; MMM= mitomycin, mitoxantrone, methotrexate; MOPP= Mustine, vincristine (Oncovin), procarbazine and prednisolone; MOPP/EVAC= Multi-drug chemotherapy with MOPP alternating every 2 weeks with etoposide, vinblastine, Adriamycin and prednisolone; NA= Not available; NHL= non-Hodgkin lymphoma; NRCT= Non-randomized clinical trial; NSCLC= Non-small cell lung cancer; OL= Open Label; PA= Paclitaxel, doxorubicin [or pirarubicin or epirubicin]; PC= Paclitaxel, cisplatin; PP= Primary Prophylactic; RCT= Randomized clinical trial; r-metHuG-CSF= Recombinant methionyl human granulocyte colony-stimulating factor; S.C.= subcutaneously; SCLC= Small-cell lung carcinoma; SD: Standard deviation; TAC = doxorubicin, cyclophosphamide, docetaxel; TC= epirubicin, docetaxel; TEC= Docetaxel, Epirubicin, cyclophosphamide; VDC= vincristine, doxorubicin, cyclophosphamide; VAPEC-B= vincristine, doxorubicin (Adriamycin), prednisone, etoposide, cyclophosphamide, bleomycin; VNCOP-B= cyclophosphamide, mitoxantrone, vincristine, etoposide, bleomycin, and prednisone.

**Table S3.** Key characteristics of included studies of Filgrastim versus Pegfilgrastim.

| Author; Year                                  | Study Design       | Cancer Type   | Cancer Stage | Country     | Patients (N)                                                                | Patient age                                                                                   | Sex (M/F)                                                     | Chemotherapy regimen | Treatment Group                                         | Intervention dose; Route                   |
|-----------------------------------------------|--------------------|---------------|--------------|-------------|-----------------------------------------------------------------------------|-----------------------------------------------------------------------------------------------|---------------------------------------------------------------|----------------------|---------------------------------------------------------|--------------------------------------------|
| <b>Chemotherapy-Induced Neutropenia (CIN)</b> |                    |               |              |             |                                                                             |                                                                                               |                                                               |                      |                                                         |                                            |
| Fengrui <i>et al</i> ; 2019                   | RCT; Phase III; OL | Breast Cancer | NA           | China       | N= 339<br>Filgrastim: n = 113<br>MPEG 110 µg/kg: n= 113<br>MPEG 6mg: n= 113 | Mean age ± SD<br>Filgrastim: 47.37±8.60<br>MPEG 110 µg/kg: 48.21±8.55<br>MPEG 6mg: 48.03±9.01 | Filgrastim: 0/110<br>MPEG 110 µg/kg: 0/111<br>MPEG 6mg: 0/110 | TC; AC               | Filgrastim and Pegfilgrastim (mecapegfilgrastim (MPEG)) | 5 µg/kg/ day vs. 100 µg/kg or 6 mg         |
| Kubo <i>et al</i> ; 2016                      | RCT; Phase III; DB | NHL or HL     | I,II,III,IV  | Japan       | N= 111<br>Filgrastim: n = 56<br>Pegfilgrastim: n= 55                        | Median (range)<br>Filgrastim: 60.5 (24-79)<br>Pegfilgrastim: 61 (28-74)                       | Filgrastim: 31/23<br>Pegfilgrastim: 35/18                     | CHASE (R)            | Filgrastim and Pegfilgrastim                            | 50 µg/m <sup>2</sup> /day vs. 3.6 mg/cycle |
| Park <i>et al</i> ; 2017                      | RCT; Phase III; OL | Breast Cancer | III          | South Korea | N= 74<br>Filgrastim: n = 38<br>DA 3031: n= 36                               | Median (range)<br>Filgrastim: 48 (30,67)<br>DA 3031: 48 (33,66)                               | 0/74                                                          | TAC                  | Filgrastim and peg-G-CSF                                | 100 µg/kg/ day vs. 6 mg/cycle              |
| Filon <i>et al</i> ; 2015                     | RCT; Phase III; DB | Breast Cancer | II/ III/ IV  | Russia      | N= 135<br>Filgrastim: n = 45<br>EMPEG 6 mg/kg: n= 45<br>EMPEG 7.5 mg: n= 45 | Age range 18-65; mean age 50.2                                                                | 0/135                                                         | DD                   | Filgrastim and Empegfilgrastim (EMPEG)                  | 5 µg/kg/day vs. 6 mg/cycle or 7.5 mg       |

|                 |                                        |                  |         |                |                                                                                                     |                                                                                                                                                       |                                         |     |                                                            |                                                  |
|-----------------|----------------------------------------|------------------|---------|----------------|-----------------------------------------------------------------------------------------------------|-------------------------------------------------------------------------------------------------------------------------------------------------------|-----------------------------------------|-----|------------------------------------------------------------|--------------------------------------------------|
| Zhang<br>2015   | <i>et al;</i><br>RCT; Phase II;<br>OL  | Breast<br>Cancer | NA      | China          | N= 171<br>Filgrastim: n = 43<br>PEG 60 µg/kg: n= 43<br>PEG 100 µg/kg: n= 43<br>PEG 120 µg/kg: n= 42 | Mean age (SD)<br>Filgrastim: n =<br>47.35 (8.14)<br>PEG 60 µg/kg:<br>47.03 (7.66)<br>PEG 100<br>µg/kg: 48.18 (8.09)<br>PEG 120<br>µg/kg: 46.71 (6.80) | 0/171                                   | TAC | Filgrastim<br>and<br>Pegfilgrastim                         | 5 µg/kg/ day<br>vs. 60 or 80 or<br>100 µg/kg/day |
| Park<br>2013    | <i>et al;</i><br>RCT; Phase II;<br>OL  | Breast<br>Cancer | II/ III | South<br>Korea | N= 61<br>Filgrastim: n = 21<br>DA-3031 3.6 mg: n= 20<br>DA-3031 6 mg : n= 20                        | Median (range)<br>Filgrastim: 47<br>(29-56)<br>DA-3031 3.6 mg:<br>43 (34-54)<br>DA-3031 6 mg :<br>46 (34,67)                                          | 0/61                                    | TAC | Filgrastim<br>and<br>Pegfilgrastim<br>(DA 3031)            | 100 µg/kg/ day<br>vs. 3.6 or 6<br>mg/cycle       |
| Salafet<br>2013 | <i>et al;</i><br>RCT; Phase II;<br>OL  | Breast<br>Cancer | NA      | Russia         | N= 60<br>Filgrastim: n = 19<br>BCD 017 3 mg: n= 21<br>BCD 017 6 mg: n= 20                           | NA                                                                                                                                                    | 0/60                                    | DD  | Filgrastim<br>and<br>BCD 017<br>Empegfilgras<br>tim (EPEG) | 5 µg/kg/day<br>vs.3 mg or 6<br>mg/cycle          |
| Green<br>2003   | <i>et al;</i><br>RCT; phase<br>III; DB | Breast<br>Cancer | NA      | Australia      | N= 152<br>Filgrastim : 75<br>Pegfilgrastim: 77                                                      | Mean age (SD):<br>Filgrastim : 52.8<br>(11.5)<br>Pegfilgrastim: 52.1<br>(9.2)                                                                         | Filgrastim: 74/1<br>Pegfilgrastim: 77/0 | DD  | Filgrastim<br>and<br>Pegfilgrastim                         | 5 µg/kg/ day<br>vs. 6 mg/day                     |

|                                     |                       |                                        |                |                      |                                                                                                    |                                                                                                                            |                                           |      |                                    |                                                          |
|-------------------------------------|-----------------------|----------------------------------------|----------------|----------------------|----------------------------------------------------------------------------------------------------|----------------------------------------------------------------------------------------------------------------------------|-------------------------------------------|------|------------------------------------|----------------------------------------------------------|
| Grigg <i>et al</i> ;<br>2003        | RCT; phase II;<br>OL  | NHL                                    | NA             | Europe,<br>Australia | N= 50<br>Filgrastim : 22<br>Pegfilgrastim: 27                                                      | Mean age (SD):<br>Filgrastim : 67.5<br>(5.7)<br>Pegfilgrastim: 69.6<br>(5.8)                                               | Filgrastim: 14/8<br>Pegfilgrastim: 9/18   | CHOP | Filgrastim<br>and<br>Pegfilgrastim | 5 µg/kg/ day<br>vs. 60<br>µg/kg/day and<br>100 µg/kg/day |
| Vose <i>et al</i> ;<br>2003         | RCT; Phase II;<br>OL  | Relapsed or<br>refractory<br>HL or NHL | I/ II/ III/ IV | USA                  | N= 60<br>Filgrastim : 31<br>Pegfilgrastim: 29                                                      | Mean age (SD):<br>Filgrastim : 48.4<br>(15.9)<br>Pegfilgrastim: 50.6<br>(13.9)                                             | Filgrastim: 17/14<br>Pegfilgrastim: 19/10 | CHOP | Filgrastim<br>and<br>Pegfilgrastim | 5 µg/kg/ day<br>vs. 100 µg/kg/<br>day                    |
| Holmes <i>et al</i> ;<br>2002       | RCT; Phase<br>III; DB | Breast<br>Cancer                       | II/ III/ IV    | USA                  | N= 296<br>Filgrastim : 147<br>Pegfilgrastim: 149                                                   | Mean age ±SD:<br>Filgrastim : 51.9 ±<br>11.1<br>Pegfilgrastim:<br>50.9 ± 11.7                                              | Filgrastim: 1/146<br>Pegfilgrastim: 2/147 | DD   | Filgrastim<br>and<br>Pegfilgrastim | 5 µg/kg/ day<br>vs. 100 µg/kg/<br>day                    |
| Holmes <i>et al</i> ;<br>2002       | RCT; Phase II;<br>DB  | Breast<br>Cancer                       | II/ III/ IV    | USA                  | N= 125<br>Filgrastim: n= 25<br>PEG 30 µg /kg: n= 19<br>PEG 60 µg/kg: n= 60<br>PEG 100 µg/kg: n= 46 | Mean age (SD):<br>Filgrastim: 50 (9)<br>PEG 30 µg /kg:<br>51 (13)<br>PEG 60 µg/kg: 51<br>(11)<br>PEG 100 µg/kg: 49<br>(11) | 0/125                                     | DD   | Filgrastim<br>and<br>Pegfilgrastim | 5 µg/kg/ day<br>vs. 30 or 60 or<br>100 µg/kg/ day        |
| <b>Acute Myeloid Leukemia (AML)</b> |                       |                                        |                |                      |                                                                                                    |                                                                                                                            |                                           |      |                                    |                                                          |
| Sierra <i>et al</i> ;<br>2008       | RCT; Phase II;<br>DB  | AML                                    | NA             | Spain                | N= 83<br>Filgrastim: n= 41<br>Pegfilgrastim: n= 42                                                 | median (range)<br>Filgrastim: 51 (18-<br>74)                                                                               | Filgrastim: 17/24<br>Pegfilgrastim: 22/20 | IC   | Filgrastim<br>and<br>Pegfilgrastim | 5 µg/kg/day vs<br>6 mg/ cycle                            |

**Abbreviations:** **AC**= Doxorubicin [or pirarubicin or epirubicin], cyclophosphamide; **AML**= Acute myeloid leukemia; **BCD**= Bortezomib, cyclophosphamide and dexamethasone; **CHASE (R)**= cyclophosphamide, cytarabine, etoposide and dexamethasone± rituximab; **CIN**= Chemotherapy-Induced Neutropenia; **CHOP** = Cyclophosphamide, doxorubicin, vincristine, prednisolone; **DB** = double-blind; **DD**= doxorubicin and docetaxel; **EMPEG**: Empegfilgrastim; **GCSF**= Granulocyte colony stimulating factor; **HL**= Hodgkin's Lymphoma; **IC**= Idarubicin, cytarabine; **MPEG**= Mecapegfilgrastim; **NA**= Not available; **NHL**= non-Hodgkin lymphoma; **OL**= Open Label; **PEG**: Pegfilgrastim; **RCT**= Randomized clinical trial; **SD**: Standard deviation; **TAC** = doxorubicin, cyclophosphamide, docetaxel; **TC**= epirubicin, docetaxel.

**Table S4.** Key characteristics of included studies of Filgrastim versus Biosimilar Filgrastim.

| Author; Year                                  | Study Design       | Cancer Type   | Cancer Stage | Country | Patients (N)                                                                    | Patient age                                                                            | Sex (M/F) | Chemotherapy regimen | Treatment Group                                 | Intervention dose; Route          |
|-----------------------------------------------|--------------------|---------------|--------------|---------|---------------------------------------------------------------------------------|----------------------------------------------------------------------------------------|-----------|----------------------|-------------------------------------------------|-----------------------------------|
| <b>Chemotherapy-Induced Neutropenia (CIN)</b> |                    |               |              |         |                                                                                 |                                                                                        |           |                      |                                                 |                                   |
| Blackwell <i>et al</i> ; 2018                 | RCT; phase III; DB | Breast Cancer | I/II/III     | USA     | N= 213<br>Filgrastim: n = 51<br>Switched<br>biosimilar: n= 109<br>EP2006: n= 53 | median age:<br>Filgrastim: 46.5<br>Switched: 50.0                                      | 0/213     | TAC                  | EP2006 and filgrastim innovator                 | 5 µg/kg/day<br>vs.<br>5 µg/kg/day |
| Hegg <i>et al</i> ; 2016                      | RCT; Phase III; OL | Breast Cancer | II/ III/ IV  | Brazil  | N= 217<br>Filgrastim: n= 108<br>Biosimilar<br>filgrastim: n= 109                | mean age ± SD<br>Filgrastim:49.04<br>±11.24<br>Biosimilar<br>filgrastim:<br>51.36±9.85 | 0/217     | TAC; DD              | Filgrastim and biosimilar filgrastim (Fiprima®) | 5 µg/kg/ day<br>vs.5 µg/kg/ day   |
| Blackwell <i>et al</i> ; 2015                 | RCT; phase III; DB | Breast Cancer | I/II/III     | USA     | N= 214<br>Filgrastim: n= 107<br>EP 2006: n= 107                                 | mean age (SD):<br>Filgrastim: 48.4<br>(11.02)<br>EP 2006: 49.5 (11.52)                 | 0/218     | TAC                  | EP2006 and filgrastim innovator                 | 5 µg/kg/day<br>vs.<br>5 µg/kg/day |

|                                                            |                                            |       |                                                |             |                                                                                                              |                                                                                                      |                                                                                                             |                                                                                          |          |                                                                                 |                                                          |
|------------------------------------------------------------|--------------------------------------------|-------|------------------------------------------------|-------------|--------------------------------------------------------------------------------------------------------------|------------------------------------------------------------------------------------------------------|-------------------------------------------------------------------------------------------------------------|------------------------------------------------------------------------------------------|----------|---------------------------------------------------------------------------------|----------------------------------------------------------|
| Waller<br>2010                                             | <i>et al;</i><br>RCT;<br>III; DB           | Phase | Breast<br>Cancer                               | NA          | Germany                                                                                                      | N= 278<br>Filgrastim: n= 95<br>Biosimilar<br>filgrastim: n= 183                                      | mean age (SD):<br>Filgrastim: 50 (8.94)<br>Biosimilar<br>filgrastim: 49.5<br>(8.78)                         | Filgrastim: 0/95<br>Biosimilar<br>filgrastim: 0/183                                      | DD       | Filgrastim<br>and<br>biosimilar<br>filgrastim<br>(Hospira)                      | 5 µg/kg/ day<br>vs.5 µg/kg/<br>day                       |
| Engert<br>2009                                             | <i>et al;</i><br>RCT;<br>III; NA           | Phase | Aggressive<br>NHL                              | NA          | Germany                                                                                                      | N= 92<br>Filgrastim: n= 29<br>XM02: n= 63                                                            | Median (range):<br>Filgrastim: 54 (18-<br>83)<br>XM02: 57 (33-83)                                           | Filgrastim: n=<br>17/12<br>XM02: n= 31/32                                                | CHOP     | Filgrastim<br>and<br>biosimilar<br>filgrastim<br>XM02                           | 5 µg/kg/day<br>vs. 5<br>µg/kg/day                        |
| del<br><i>et al;</i> 2008                                  | Giglio<br>RCT;<br>III; SB                  | Phase | Breast<br>Cancer                               | II/ III/ IV | Brazil,<br>Belarus,<br>Lithuania,<br>Romania,<br>Germany,<br>Chile,<br>South<br>Africa,<br>Russia,<br>Poland | N= 348<br>Filgrastim: n = 136<br>XM02: n= 140<br>Placebo/ XM02: n= 72                                | median (range)<br>Filgrastim: 51 (28-<br>74)<br>XM02: 51 (25-75)<br>Placebo/ XM02: 48<br>(28-74)            | Filgrastim: 1/135<br>XM02: 1/139<br>Placebo/ XM02:<br>0/72                               | DD       | Filgrastim<br>and<br>biosimilar<br>filgrastim<br>XM02 and<br>placebo            | Filgrastim and<br>XM02:<br>5 µg/kg/day;<br>S.C.          |
| <b>Peripheral Blood Collection by Leukapheresis (PBCL)</b> |                                            |       |                                                |             |                                                                                                              |                                                                                                      |                                                                                                             |                                                                                          |          |                                                                                 |                                                          |
| Sivgin<br>2016                                             | <i>et al;</i><br>Observational<br>; NA; NA |       | AML; ALL;<br>aplastic<br>anaemia;<br>lymphomas | NA          | Turkey                                                                                                       | N= 243<br>Filgrastim: n= 201<br>Filgrastim<br>biosimilar<br>(Leucostim): n= 14<br>Lenograstim: n= 28 | Mean age (donor)<br>Filgrastim:<br>31.20±12.92<br>Filgrastim<br>biosimilar<br>(Leucostim): 34.07 ±<br>11.67 | Filgrastim: 107/94<br>Filgrastim<br>biosimilar<br>(Leucostim): 8/6<br>Lenograstim: 18/10 | alloHSCT | Filgrastim vs.<br>Filgrastim<br>biosimilar<br>(Leucostim)<br>vs.<br>Lenograstim | 11µg/kg/day<br>vs. 10.35<br>µg/kg/day vs.<br>11µg/kg/day |

Lenograstim:

29.21 ± 11.05

Mean age (patient)

Filgrastim: 31.12

±11.35 Filgrastim

biosimilar

(Leucostim): 32.43 ±

9.94

Lenograstim: 25.75

± 8.72

|                                  |                           |                                 |    |        |                                                                                               |                                                                                                                              |                                                                                    |          |                                                                         |                       |
|----------------------------------|---------------------------|---------------------------------|----|--------|-----------------------------------------------------------------------------------------------|------------------------------------------------------------------------------------------------------------------------------|------------------------------------------------------------------------------------|----------|-------------------------------------------------------------------------|-----------------------|
| Skopec <i>et al</i> ;<br>2016    | Observational<br>; NA; NA | MM                              | NA | Europe | N= 39<br>Filgrastim: n= 20<br>Pegfilgrastim: n= 19                                            | Median (range)<br>Filgrastim: 60 (35-<br>69)<br>Pegfilgrastim: 64<br>(51-71)                                                 | Filgrastim: 11/9<br>Pegfilgrastim: 9/10                                            | alloHSCT | Filgrastim<br>and<br>Pegfilgrastim                                      | 10 µg/kg/day;<br>S.C. |
| Yoshimura<br><i>et al</i> ; 2017 | Observational<br>; NA; NA | Malignant<br>Lymphoma<br>and MM | NA | Japan  | N= 69<br>Filgrastim: n= 34<br>Filgrastim<br>biosimilar (XM02):<br>n= 12<br>Lenograstim: n= 23 | Median (range)<br>Filgrastim: 58 (30-<br>72)<br>Filgrastim<br>biosimilar (XM02):<br>55 (23-66)<br>Lenograstim: 56<br>(28-69) | Filgrastim: 17/17<br>Filgrastim<br>biosimilar (XM02):<br>7/5<br>Lenograstim: 15/18 | NA       | Filgrastim vs.<br>Filgrastim<br>biosimilar<br>(XM02) vs.<br>Lenograstim | 5 µg/kg/ day;<br>S.C. |

**Abbreviations:** **alloHSCT**= allogeneic hematopoietic stem cell transplantation; **CHOP** = Cyclophosphamide, doxorubicin, vincristine, prednisolone; **DB**= double-blind; **DD**= doxorubicin and docetaxel; **MM**= Multiple Myeloma; **NA**= Not available; **OL**= Open Label; **PBCL**= Peripheral Blood Collection by Leukapheresis; **RCT**= Randomized clinical trial; **SB**= single blind; **SD**: Standard deviation; **TAC**= doxorubicin, cyclophosphamide, docetaxel.

**Table S5.** Baseline and clinical patients' characteristics: (Filgrastim versus Placebo controlled trial/ no treatment).

|              | CIN (1)                 |                                                  | AML (2)                 |                                                  | SCN (3)               |                                                |
|--------------|-------------------------|--------------------------------------------------|-------------------------|--------------------------------------------------|-----------------------|------------------------------------------------|
|              | Filgrastim<br>(n= 2837) | Placebo controlled/<br>No treatment<br>(n= 3608) | Filgrastim<br>(n= 1028) | Placebo controlled/<br>No treatment<br>(n= 1047) | Filgrastim<br>(n= 79) | Placebo controlled/<br>No treatment<br>(n= 83) |
| Age (median) | 56                      | 55                                               | 49                      | 47                                               | 6                     | 6                                              |
| Women, %     | 70                      | 71                                               | 36                      | 37                                               | 53                    | 49                                             |

Abbreviations: CIN: Chemotherapy Induced Neutropenia; AML: Acute Myeloid Leukaemia; SCN: Severe chronic neutropenia.

**Table S6.** Baseline and clinical patients' characteristics (Filgrastim versus Pegfilgrastim).

|              | CIN (1)                     |                         | AML (2)                  |                       |
|--------------|-----------------------------|-------------------------|--------------------------|-----------------------|
|              | Pegfilgrastim<br>(n= 1023 ) | Filgrastim<br>(n= 635 ) | Pegfilgrastim<br>(n= 42) | Filgrastim<br>(n= 41) |
| Age (median) | 50                          | 49                      | 54                       | 51                    |
| Women, %     | 72                          | 81                      | 47                       | 58                    |

Abbreviations: CIN: Chemotherapy Induced Neutropenia; AML: Acute Myeloid Leukaemia.

**Table S7.** Baseline and clinical patients' characteristics (Filgrastim versus Biosimilar Filgrastim).

|              | CIN (1)                |                                   |
|--------------|------------------------|-----------------------------------|
|              | Filgrastim<br>(n= 526) | Biosimilar Filgrastim<br>(n= 836) |
| Age (median) | 50                     | 50                                |
| Women, %     | 97                     | 96                                |

Abbreviations: CIN: Chemotherapy Induced Neutropenia.

**Table S8.** Type of Trial reported (Filgrastim versus Placebo controlled trial/ no treatment).

|                      | CIN (1)<br>(n=21) | AML (2)<br>(n= 7) | SCN (3)<br>(n= 2) | BMT (4)<br>(n= 4) |
|----------------------|-------------------|-------------------|-------------------|-------------------|
| <b>RCT</b>           | 14                | 6                 | 1                 | 2                 |
| <b>NRCT</b>          | 1                 | 1                 | 0                 | 0                 |
| <b>Observational</b> | 6                 | 0                 | 1                 | 2                 |

Abbreviations: AML: Acute Myeloid Leukaemia; CIN: Chemotherapy Induced Neutropenia; RCT: Randomized clinical trial; NRCT: Non-randomized clinical trial; SCN: Severe chronic neutropenia.

**Table S9.** Type of Trial reported (Filgrastim versus Pegfilgrastim).

|                      | CIN (1)<br>(n=12) | AML (2)<br>(n= 1) |
|----------------------|-------------------|-------------------|
| <b>RCT</b>           | 12                | 1                 |
| <b>NRCT</b>          | 0                 | 0                 |
| <b>Observational</b> | 0                 | 0                 |

Abbreviations: AML: Acute Myeloid Leukaemia; CIN: Chemotherapy Induced Neutropenia; RCT: Randomized clinical trial; NRCT: Non-randomized clinical trial.



**Table S10.** Type of Trial reported (Filgrastim versus Biosimilar Filgrastim).

|                      | CIN (1)<br>(n=6) | PBCL (2)<br>(n= 3) |
|----------------------|------------------|--------------------|
| <b>RCT</b>           | 6                | 0                  |
| <b>NRCT</b>          | 0                | 0                  |
| <b>Observational</b> | 0                | 3                  |

Abbreviations: RCT: Randomized clinical trial; NRCT: Non-randomized clinical trial; PBCL: Peripheral Blood Collection by Leukapheresis.

**Table S11.** Key characteristics of studies that compared Filgrastim with Placebo or no treatment by indication and study type.

|                                        |                                                            |                                                                                                                              | Efficacy and Effectiveness                |                                                                                           |                                                            |                                                 |                                                  |                                                                                                                                                                                                                                                                                                          | Safety                 |                                                                                                                |
|----------------------------------------|------------------------------------------------------------|------------------------------------------------------------------------------------------------------------------------------|-------------------------------------------|-------------------------------------------------------------------------------------------|------------------------------------------------------------|-------------------------------------------------|--------------------------------------------------|----------------------------------------------------------------------------------------------------------------------------------------------------------------------------------------------------------------------------------------------------------------------------------------------------------|------------------------|----------------------------------------------------------------------------------------------------------------|
| Author;<br>Year                        | Cancer Type                                                | Patients (N)                                                                                                                 | Time to<br>ANC or<br>platelet<br>recovery | Incidence/<br>Duration of FN                                                              | Incidence/<br>Duration of<br>grade 3 or 4<br>neutropenia   | Incidence of<br>infection/<br>antibiotic<br>use | Incidence/<br>Duration of<br>Hospitaliza<br>tion | RDI, Dose Delays or<br>dose reductions                                                                                                                                                                                                                                                                   | Survival/<br>mortality | AE                                                                                                             |
| Chemotherapy-Induced Neutropenia (CIN) |                                                            |                                                                                                                              |                                           |                                                                                           |                                                            |                                                 |                                                  |                                                                                                                                                                                                                                                                                                          |                        |                                                                                                                |
| Chen <i>et al</i> ;<br>2017            | Colorectal<br>cancer                                       | N= 100<br>Filgrastim: n = 50<br>Placebo: n= 50                                                                               | -                                         | FN incidence<br>0% vs. 6%                                                                 | Leukopeni<br>a Grade III/<br>IV: 36% vs.<br>72%<br>P <0.05 | NA                                              | NA                                               | NA                                                                                                                                                                                                                                                                                                       | NA                     | AEs in treatment<br>group:<br>low-grade fever/chill<br>(14%), fatigue (8%),<br>nausea (6%), headache<br>(12%). |
| Altwaairgi<br><i>et al</i> ; 2013      | Breast<br>Cancer                                           | N = 239<br>PP G-CSF<br>(filgrastim or<br>pegfilgrastim) =<br>145<br>No PP G-CSF<br>(secondary G-<br>CSF or no G-CSF)<br>= 94 | -                                         | FN incidence<br>14% vs. 31 %<br>P = 0.002                                                 | NA                                                         | NA                                              | NA                                               | RDI (range) for pts who<br>received the FEC/D<br>regimen<br><b>98% (75%–117%) vs<br/>95% (60%–100%)</b><br>P = 0.05<br>Achievement of<br>RDI >85% for pts who<br>received the FEC/D<br>regimen 97% vs 92%<br>P = 0.118<br>Dose delay 17% vs 27%<br>P = 0.060<br>Dose reduction 19% vs<br>25%<br>P = 0.28 | NA                     | NA                                                                                                             |
| Hershman<br><i>et al</i> ; 2009        | Breast<br>Cancer, lung<br>cancer,<br>ovarian<br>cancer, or | N = 3123<br>PP G-CSF<br>(filgrastim or<br>pegfilgrastim) =<br>822                                                            | -                                         | PP G-CSF vs. no<br>PP G-CSF 4.5%<br>vs. 7.5%<br>OR=0.49, 95%<br>CI 0.34–0.71,<br>p<0.001) | NA                                                         | NA                                              | NA                                               | NA                                                                                                                                                                                                                                                                                                       | NA                     | NA                                                                                                             |

|                                  |                           |                                                                                                                                    |   |                                                 |                                                                                                                                                                       |                                                    |                                                                                                                     |                                                                                                                                                                           |                    |                                    |
|----------------------------------|---------------------------|------------------------------------------------------------------------------------------------------------------------------------|---|-------------------------------------------------|-----------------------------------------------------------------------------------------------------------------------------------------------------------------------|----------------------------------------------------|---------------------------------------------------------------------------------------------------------------------|---------------------------------------------------------------------------------------------------------------------------------------------------------------------------|--------------------|------------------------------------|
|                                  | colon cancer, or lymphoma | No PP G-CSF (delayed filgrastim or pegfilgrastim = 1523 or no G-CSF = 778)                                                         |   |                                                 |                                                                                                                                                                       |                                                    |                                                                                                                     |                                                                                                                                                                           |                    |                                    |
| Blayney <i>et al</i> ; 2005      | NSCLC, NHL                | N= 104<br>NSCLC (n= 55):<br>Filgrastim: n = 46<br>No filgrastim: n= 9<br>NHL (n= 49):<br>Filgrastim: n = 44<br>No filgrastim: n= 5 | - | NA                                              | Grade 3 and grade 4 neutropenia: 62% and 77% lower with filgrastim <sup>b</sup><br>Median duration of grade 3 and grade 4 neutropenia: 81% and 94% lower <sup>b</sup> | NA                                                 | Mean (SD) days in hospital NSCLC 12.8 (13.1) vs 15.1 (17.5) <sup>b</sup><br>NHL 4.7 (8.4) vs 2.4 (3.3) <sup>b</sup> | NSCLC<br>Dose reduction 3% vs 12% <sup>b</sup><br>Dose delay 12% vs 38% <sup>b</sup><br>NHL<br>Dose reduction 12% vs 0% <sup>b</sup><br>Dose delay 6% vs 12% <sup>b</sup> | NA                 | AEs reported not specific to G-CSF |
| Crawford <i>et al</i> ; 2005     | SCLC                      | N= 231<br>Filgrastim: n = 111<br>Placebo: n= 120                                                                                   | - | FN incidence 38% vs. 74%<br>P < 0.0001          | Grade 4 neutropenia incidence in cycle 1 82% vs. 97%<br><br>Across all cycles grade 4 incidence 56% vs. 89%<br>P < 0.0001                                             | NA                                                 | NA                                                                                                                  | Response rate 68% vs. 72%                                                                                                                                                 | NA                 | AEs reported not specific to G-CSF |
| Timmer-Bonte <i>et al</i> ; 2005 | SCLC                      | N= 175<br>Filgrastim: n = 90<br>Placebo: n= 85                                                                                     | - | FN incidence in cycle 1: 10% vs. 24%<br>P= 0.01 | NA                                                                                                                                                                    | Infection was 0.14 infections per patient vs. 0.21 | Median duration of hospitalization 7days vs. 15days                                                                 | NA                                                                                                                                                                        | 3% vs 6% mortality | Fever in cycle 1 was 12% vs 27%    |

|                               |                |                                                  |   |                                                                                                       |                                                                                            |                                                                                                                                                        |                                                                                               |                                                                     |                                                                       |                                                                                                                                                                                                                                                                                                                   |
|-------------------------------|----------------|--------------------------------------------------|---|-------------------------------------------------------------------------------------------------------|--------------------------------------------------------------------------------------------|--------------------------------------------------------------------------------------------------------------------------------------------------------|-----------------------------------------------------------------------------------------------|---------------------------------------------------------------------|-----------------------------------------------------------------------|-------------------------------------------------------------------------------------------------------------------------------------------------------------------------------------------------------------------------------------------------------------------------------------------------------------------|
|                               |                |                                                  |   | FN incidence 2 to 5 cycles: 11% vs 17%                                                                |                                                                                            | infections per patient                                                                                                                                 |                                                                                               |                                                                     |                                                                       |                                                                                                                                                                                                                                                                                                                   |
|                               |                |                                                  |   | Overall FN incidence 18% vs. 32%                                                                      |                                                                                            |                                                                                                                                                        |                                                                                               |                                                                     |                                                                       |                                                                                                                                                                                                                                                                                                                   |
| Doorduijn <i>et al</i> ; 2003 | Aggressive NHL | N= 389<br>Filgrastim: n = 197<br>Placebo: n= 192 | - | FN incidence 72 pts (36.5%) vs 86 pts (44.8%)<br>Median (range) days 2 (1–14) vs 3 (1–32)<br>P = 0.04 | NA                                                                                         | Infections 8% vs 12%<br>P = 0.004<br>Severe infections 3% vs 3%<br>P = 0.82<br>Median antibiotic use, days (range) 0 (0–126) vs 6 (0–180)<br>P = 0.006 | Days (range) hospitalization 5 [0–157] vs 6 [0–111]<br>P = 0.40                               | Median (range) RDI 95.1% (39.4–110) vs 93.4% (47.7–109)<br>P = 0.12 | OS at 5 years 24% vs 22%<br>P = 0.76                                  | Grade 3/4 AEs<br>Neurotoxicity 13 (1%) vs 33 (3%)<br>Nausea/vomiting 15 (1%) vs 18 (2%)<br>Diarrhea 8 (1%) vs 2 (<1%)<br>Oral toxicity 2 (<1%) vs 4 (<1%)<br>Cardiac toxicity 9 (1%) vs 6 (1%)<br>Hemorrhage NA vs 1 (<1%)<br>Liver toxicity NA vs 1 (<1%)<br>Bone pain 3 (<1%) vs NA<br>Other 23 (2%) vs 30 (3%) |
| Osby <i>et al</i> ; 2003      | Aggressive NHL | N= 455<br>Filgrastim: n = 226<br>Placebo: n= 229 | - | Granulocyte fever (<0.5x10 <sup>9</sup> /L)<br>CHOP arms 34% vs 50%<br>CNOP arms 32% vs 50%           | Granulocytopenia (<0.5x10 <sup>9</sup> /L)<br>CHOP arms 55% vs 89%<br>CNOP arms 64% vs 86% | NA                                                                                                                                                     | Granulocyte fever requiring hospitalization (0.5x10 <sup>9</sup> /L): 33% vs 50%<br>P = 0.001 | RDI ≥90% during 8 courses<br>44% vs 34%<br>P < 0.05                 | OS rates CHOP ± filgrastim 61% vs 51%<br>CNOP ± filgrastim 33% vs 33% | CHOP + filgrastim vs CHOP<br>Mucositis 5% vs 4%<br>GI toxicity 15% vs 10%<br>Alopecia 80% vs 81%<br>Cardiac toxicity 5% vs 3%<br>Musculoskeletal pain 10% vs 2%<br>CNOP + filgrastim vs CNOP                                                                                                                      |

|                             |                          |                                                                                   |   |                                           |                                                           |                                             |                                               |                                                                                                                                            |                                                                                         |                                                                                                                                                                                                                                                                                                            |
|-----------------------------|--------------------------|-----------------------------------------------------------------------------------|---|-------------------------------------------|-----------------------------------------------------------|---------------------------------------------|-----------------------------------------------|--------------------------------------------------------------------------------------------------------------------------------------------|-----------------------------------------------------------------------------------------|------------------------------------------------------------------------------------------------------------------------------------------------------------------------------------------------------------------------------------------------------------------------------------------------------------|
|                             |                          |                                                                                   |   |                                           |                                                           |                                             |                                               |                                                                                                                                            |                                                                                         | Mucositis 3% vs 2%<br>GI toxicity 8% vs 5%<br>Alopecia 47 vs 41<br>Cardiac toxicity 3 vs 1                                                                                                                                                                                                                 |
| Papaldo <i>et al</i> ; 2003 | Breast Cancer            | N= 503<br>Filgrastim: n = 254<br>No Filgrastim: n= 249                            | - | FN incidence<br>1.2% vs 6.6%<br>P = 0.004 | Grade 3/4<br>Neutropenia<br>28.6% vs 81.6%<br>P < 0.00001 | NA                                          | NA                                            | Dose reduction<br>1.4% vs 3.6%<br>P = 0.002<br>Dose delay<br>3.6% vs 10%<br>P < 0.0001<br>Dose intensity<br>98.1% vs 95.5% NS              | 5-year OS<br>80.6% vs 79.6%<br>NS<br>DFS<br>67.2% vs 72.9%<br>NS                        | Bone pain (grade 1 to 3)<br>42.5%<br>Fever (grade 1/2)<br>16.3%                                                                                                                                                                                                                                            |
| Gilad <i>et al</i> ; 1999   | Solid tumors or lymphoma | N= 209 (1079 cycles)<br>Cycles with PP filgrastim = 66<br>Cycles with no PP= 1013 | - | FN incidence<br>4.5% vs 3.7%<br>P = 0.441 | NA                                                        | Infections<br>1.5% vs 1.0%<br>P = 0.781     | Hospitalized pts<br>6.0% vs 4.5%<br>P = 0.958 | NA                                                                                                                                         | Deaths:<br>1 pt vs 1 pt,<br>none from infectious complication                           | AEs during induction<br>1<br>Rash 3 vs 2<br>Musculoskeletal pain 2 vs 1                                                                                                                                                                                                                                    |
| Fossa <i>et al</i> ; 1998   | GCM                      | N= 259<br>Filgrastim: n = 129<br>No Filgrastim: n= 130                            | - | FN incidence<br>20% vs 30%<br>P < 0.052   | NA                                                        | Blood culture proven sepsis<br>6.3% vs 7.8% | NA                                            | Received chemotherapy ≥6 cycles<br>86% vs 71%<br>P = 0.003<br><br>Dose intensity:<br>Significantly higher dose intensities with filgrastim | 1-year survival<br>83% (78–91) vs 75% (67–82)<br><br>Death due to toxicities<br>5 vs 15 | n, (%)<br>BEP/EP and BOP/VIP-B<br>WBC<br>Grade 3: 7 (11)/12 (18) and 23 (36)/24 (37)<br>Grade 4: 8 (13)/12 (18) and 8 (13)/32 (49)<br>Platelet count<br>Grade 3: 14 (22)/15 (23) and 4 (6)/10 (15)<br>Grade 4: 13 (21)/25 (38) and 6 (9)/22 (33)<br>Neutropenic fever<br>9 (14)/16 (25) and 8 (13)/30 (46) |

|                            |     |                                                 |                                                                                                                                                                                                             |    |                                                                                                                                                                                                            |                                   |                                                                                                                                                                                  |    |                                                                                                                                                                     |                                                                                                                                                                                                                                                                                                                                                                                                  |
|----------------------------|-----|-------------------------------------------------|-------------------------------------------------------------------------------------------------------------------------------------------------------------------------------------------------------------|----|------------------------------------------------------------------------------------------------------------------------------------------------------------------------------------------------------------|-----------------------------------|----------------------------------------------------------------------------------------------------------------------------------------------------------------------------------|----|---------------------------------------------------------------------------------------------------------------------------------------------------------------------|--------------------------------------------------------------------------------------------------------------------------------------------------------------------------------------------------------------------------------------------------------------------------------------------------------------------------------------------------------------------------------------------------|
|                            |     |                                                 |                                                                                                                                                                                                             |    |                                                                                                                                                                                                            |                                   |                                                                                                                                                                                  |    |                                                                                                                                                                     | Blood culture proven sepsis<br>4 (6)/4 (6) and 3 (5)/7 (11)<br>Mucosal toxicity<br>Grade 3: 4 (6)/4 (6) and 2 (3)/3 (5)<br>Grade 4: 0 (0)/0 (0) and 0 (0)/3 (5)<br>Pulmonary toxicity<br>Grade 1/2: 16 (25)/11(17) and 10 (16)/9 (14)<br>Grade 3: 0 (0)/3 (5) and 2 (3)/1 (2)<br>Grade 4: 2 (3)/1 (2) and 0 (0)/3 (5)                                                                            |
| Larson <i>et al</i> ; 1998 | ALL | N= 198<br>Filgrastim: n = 102<br>Placebo: n= 96 | Median days (IQR) to ANC recovery (>1000/ $\mu$ L)<br>Course I 16 (15–18) vs 22 (19–29)<br>P < 0.001<br>Course IIA 20 (6–25) vs 29 (22–31)<br>P < 0.001<br>Course IIB 25 (15–32) vs 31 (27–39)<br>P < 0.001 | NA | Median (IQ3) Neutropenia (ANC <1000/ $\mu$ L), days:<br>Course I 13 (10–16) vs 20 (15–27)<br>P < 0.001<br>Course IIA 5 (0–12) vs 13 (6–18)<br>P < 0.001<br>Course IIB 11 (4–17) vs 14 (10–25)<br>P = 0.001 | Infections<br>78% vs 87% P = 0.13 | Median (IQ3) hospital stay, days:<br>Course I 22 (18–29) vs 28 (22–33)<br>P = 0.02<br>Course IIA 7 (0–17) vs 3 (0–14)<br>P = 0.32<br>Course IIB 4 (0–21) vs 2 (0–15)<br>P = 0.17 | NA | Estimated median overall survival after 4.7 years follow-up (years)<br>2.4 vs 1.8<br>P = 0.25<br>Died during induction, n (%):<br>All eNAolled pts 5 (5) vs 11 (11) | Grade 3/4/5 toxicity<br>Pain, 21% vs 14%, P = 0.026<br>All other AEs were not significantly different<br>Infection, 78% vs 87%<br>Malaise/fatigue (PS >2), 16% vs 25%<br>Hemoglobin (<6.5 g/dL), 93% vs 86%<br>Hypofibrinogenemia (<0.5 x normal), 26% vs 18%<br>Bilirubin (>1.5 x normal), 44% vs 51%<br>Nausea, 23% vs 28%<br>Motor neuropathy, 18% vs 22%<br>WBC (<1000/ $\mu$ L), 98% vs 97% |

|                              |                          |                                               |                                                                                                                                                                                                                           |                                                                                                                                             |    |                                                       |                                          |    |                                                                                                                                                                      |                                                                                                                              |
|------------------------------|--------------------------|-----------------------------------------------|---------------------------------------------------------------------------------------------------------------------------------------------------------------------------------------------------------------------------|---------------------------------------------------------------------------------------------------------------------------------------------|----|-------------------------------------------------------|------------------------------------------|----|----------------------------------------------------------------------------------------------------------------------------------------------------------------------|------------------------------------------------------------------------------------------------------------------------------|
|                              |                          |                                               | Median (IQR) days to platelet recovery (>50000/ $\mu$ L):<br>Course I<br>16 (14–20) vs 19 (15–23)<br>P = 0.003<br>Course IIA<br>20 (17–22) vs 20 (18–22)<br>P = 0.53<br>Course IIB<br>24 (21–31) vs 22 (0–28)<br>P = 0.03 |                                                                                                                                             |    |                                                       |                                          |    | All eligible pts<br>4 (4) vs 10 (11)<br>Died in complete remission,<br>n (%): 8 (8) vs 5 (5)<br>Alive in continuous complete remission,<br>n (%): 35 (41) vs 22 (31) | Platelets (<25000/ $\mu$ L), 97% vs 95%<br>Hyperglycemia (>250 mg/dL), 33% vs 35%<br>Transaminases (>5 x normal), 35% vs 35% |
| Michon <i>et al</i> ; 1998   | Metastatic Neuroblastoma | N= 59<br>Filgrastim: n = 31<br>Placebo: n= 28 | -                                                                                                                                                                                                                         | FN Incidence<br>CADO 42% vs. 57%<br>P = 0.24<br>CDDP 16% vs. 36%<br>P = 0.08<br>CADO 26% vs. 44%<br>P = 0.14<br>CDDP 3% vs. 19%<br>P = 0.06 | NA | NA                                                    | Median hospital stay 20 days vs. 28 days | NA | Deaths 1 patient vs. 1 Patient                                                                                                                                       | Median duration of fever 4 days vs. 6 days<br>P = 0.12                                                                       |
| Geissler <i>et al</i> ; 1997 | ALL                      | N= 51<br>Filgrastim: n = 25<br>Placebo: n= 26 | median times to recovery to ANC $\geq$                                                                                                                                                                                    | FN Incidence<br>12% vs. 42%                                                                                                                 | NA | Infections<br>40% vs. 77%<br>Patients with infections | NA                                       | NA | Death 1 patient vs. 2                                                                                                                                                | Hyperbilirubinemia 15 vs. 11<br>Hypofibrinogenemia 11 vs. 11                                                                 |

|                         |     |                                                |                                                                                                                                                                                                              |                                                        |    |                                                                                                                                                                                             |                                                                                                                                                                              |    |                                   |                                                                                                                                                                                                                                  |
|-------------------------|-----|------------------------------------------------|--------------------------------------------------------------------------------------------------------------------------------------------------------------------------------------------------------------|--------------------------------------------------------|----|---------------------------------------------------------------------------------------------------------------------------------------------------------------------------------------------|------------------------------------------------------------------------------------------------------------------------------------------------------------------------------|----|-----------------------------------|----------------------------------------------------------------------------------------------------------------------------------------------------------------------------------------------------------------------------------|
|                         |     |                                                | 1000 and ≥ 500/μL were significantly shorter in the G-CSF group as compared with the controls (ANC ≥ 1,000: 16 v 26 days, P < 0.0005, logrank test; ANC ≥ 500: 16 v 24 days, P < 0.005)                      |                                                        |    | Septicemia 2 vs. 8<br>Bacteremia 2 vs. 3<br>FUO 1 vs. 4<br>Pneumonia 1 vs. 3<br>Oral infection 3 vs. 5<br>Skin infection 1 vs. 1<br>Herpes 4 vs. 5<br>Otitis 0 v. 1                         |                                                                                                                                                                              |    |                                   | Diarrhea 1 vs. 5<br>Constipation 1 vs. 2<br>Nausea/vomiting 2 vs. 0<br>Psychiatric symptoms 1 vs. 0<br>Peripheral neuropathy 2 vs. 0<br>Hyperglycemia 1 vs. 2<br>Gut perforation 1 vs. 1<br>Pneumothorax 1 vs. 0<br>Rash 0 vs. 1 |
| Pui <i>et al</i> ; 1997 | ALL | N= 148<br>Filgrastim: n = 73<br>Placebo: n= 75 | ANC recovery<br>Median days (range) for recovery to 0.5x10 <sup>9</sup><br>5.3 vs 12.7<br><br>Platelets recovery (x10 <sup>-3</sup> /mm <sup>3</sup> )<br>14 (2–330) vs 18 (3–120)<br><75000/mm <sup>3</sup> | Median (range) days with fever<br>2 (0–36) vs 2 (0–27) | NA | All infections 12 pts (16%) vs 27 (36%)<br>P = 0.009<br><br>Grade 3/4 infections 5 pts (7%) vs 6 pts (8%)<br><br>IV antibiotics use 42 pts vs 51 pts<br><br>Median days (range) duration of | Incidence of FN-related hospitalization 42 pts (58%) vs 52 pts (68%)<br>P = 0.23<br><br>Median days (range) duration hospital stay for FN 6 (1–37) vs 10 (1–30)<br>P = 0.011 | NA | EFS at 3 years, 83% (both groups) | Grade ¾ Pneumonia 3 vs 2<br>Bacteremia 1 vs 3<br>Disseminated fungal infection 0 vs 1<br>Typhlitis 1 vs 0<br>AML incidence 5.1% vs 3.9%<br>P = 0.39                                                                              |



|                             |                |                                                      |            |    |                                                             |                                                                                                                                                                                                                                                                                                                    |    |                              |                            |                                       |
|-----------------------------|----------------|------------------------------------------------------|------------|----|-------------------------------------------------------------|--------------------------------------------------------------------------------------------------------------------------------------------------------------------------------------------------------------------------------------------------------------------------------------------------------------------|----|------------------------------|----------------------------|---------------------------------------|
|                             |                |                                                      | 8.9 vs 8.3 |    |                                                             | IV antibiotic use 6 (2-36) vs 9 (2-30)                                                                                                                                                                                                                                                                             |    |                              |                            |                                       |
| Zinzani <i>et al</i> ; 1997 | Aggressive NHL | N= 149<br>Filgrastim: n = 77<br>No filgrastim: n= 72 | -          | NA | Grade 4 neutropenia incidence 23.0% vs 55.5%<br>P = 0.00005 | Infections 4/77 pts (5%) vs 15/72 pts (21%)<br>P = 0.004<br>Antibiotic use For filgrastim, 4 pts with minor infections required symptomatic treatments and/or oral antibiotics vs For control, 5 pts with major infections and 10 pts with minor infections required parenteral antibiotics and/or hospitalization | NA | Average RDI 95% vs 85%<br>NS | OS at 30 months 64% vs 62% | Musculoskeletal pain 2 (3%) vs 0 (0%) |

|                                       |                               |                                                     |                                                                                       |                                                         |                                                              |                                                                                                                        |                                                          |                                                                                                          |                                                                                          |                                                                                                                                                                                                       |
|---------------------------------------|-------------------------------|-----------------------------------------------------|---------------------------------------------------------------------------------------|---------------------------------------------------------|--------------------------------------------------------------|------------------------------------------------------------------------------------------------------------------------|----------------------------------------------------------|----------------------------------------------------------------------------------------------------------|------------------------------------------------------------------------------------------|-------------------------------------------------------------------------------------------------------------------------------------------------------------------------------------------------------|
| Ottmann<br><i>et al</i> ; 1995        | ALL                           | N= 76<br>Filgrastim: n = 37<br>No filgrastim: n= 39 | -                                                                                     | Duration of prolonged neutropenia incidence 22% vs. 42% | NA                                                           | Infections 43% vs. 56%<br>P = 0.25<br><br>Non viral infections 16 episodes vs. 32 episodes                             | NA                                                       | NA                                                                                                       | Death 0 vs. 1                                                                            | Thrombocytopenia 65% and 58%<br>Fever 35% vs. 47%<br>Musculoskeletal pain 5 patients vs. 7 patients                                                                                                   |
| Maher<br><i>et al</i> ; 1994          | ALL/Lymphoma                  | N= 216<br>Filgrastim: n = 109<br>Placebo: n= 107    | -                                                                                     | NA                                                      | NA                                                           | NA                                                                                                                     | NA                                                       | NA                                                                                                       | Deaths 11% vs. 14%                                                                       | Thrombocytopenia 53% vs. 52%<br>Fever mean days 4.1 (0-18) vs. 5.1 (0-28)<br>Musculoskeletal pain 32% vs. 22%<br>Anemia 57% vs. 60%<br>RBC transfusion 65% vs. 62%<br>Platelet transfusion 35% vs 34% |
| Gebbia<br><i>et al</i> ; 1993         | Breast Cancer/SCLC /HNC/HC/GC | N= 86<br>Filgrastim: n = 43<br>Placebo: n= 43       | ANC 18% vs 42%<br>P <0.05<br>Duration of neutropenia 4.8 days vs. 8.2 days<br>P <0.05 | Incidence of FN 12% vs. 32%<br>P <0.05                  | Grade 3 and 4 neutropenia 18% vs. 42%<br>P <0.05             | Oral fungal infection 9% vs 21%                                                                                        | NA                                                       | RDI 91% vs 71%<br>P <0.05                                                                                | NA                                                                                       | Muscular and bone pain 5% patients<br>Confusion 2 patients                                                                                                                                            |
| Trillet-Lenoir<br><i>et al</i> ; 1993 | SCLC                          | N= 129<br>Filgrastim: n = 65<br>Placebo: n= 64      | -                                                                                     | FN incidence 26% vs 53%<br>P = 0.002                    | Median duration (days) of neutropenia over 6 cycles: 6 vs 15 | Infection rate 20% vs 33%<br>P = 0.101<br>Infection-related deaths 1 vs 3<br>IV antibiotics use 37% vs 58%<br>P < 0.02 | Infection-related hospitalization 39% vs 58%<br>P < 0.04 | Dose reduction ≥15% over all cycle 29% vs 61%<br>P < 0.001<br>Dose delay ≥2 days in ≥1 cycles 29% vs 47% | Median survival (months)<br>Extensive disease 8.9 vs 9.5<br>Limited disease 13.9 vs 12.8 | Incidence 15% vs 9%<br>Musculoskeletal pain, alopecia, nausea, vomiting, stomatitis, diarrhea                                                                                                         |

|                              |      |                                                       |    |                                                                                                                                                                                                                               |                                                                                                                                                                                 |                                                                                                                                                                                                     |                                                                                                                                                           |                                                                                                |                                                                                                                   |                                                                                                                                                                                                     |
|------------------------------|------|-------------------------------------------------------|----|-------------------------------------------------------------------------------------------------------------------------------------------------------------------------------------------------------------------------------|---------------------------------------------------------------------------------------------------------------------------------------------------------------------------------|-----------------------------------------------------------------------------------------------------------------------------------------------------------------------------------------------------|-----------------------------------------------------------------------------------------------------------------------------------------------------------|------------------------------------------------------------------------------------------------|-------------------------------------------------------------------------------------------------------------------|-----------------------------------------------------------------------------------------------------------------------------------------------------------------------------------------------------|
| Crawford <i>et al</i> ; 1991 | SCLC | N= 199<br>Filgrastim: n = 95<br>Placebo: n= 104       | -  | FN incidence in cycle 1<br>28% vs 57%<br>P <0.001<br>FN incidence across 6 cycles<br>40% vs 77%<br>P <0.001<br>Median duration (days) in cycle 1<br>3 vs 6<br>P <0.001<br>Median duration (days) across 6 cycles 1 vs 6<br>NS | Grade 4 neutropenia incidence in cycle 1<br>84% vs 98%<br>P = 0.001<br>Median duration (days) in cycle 1<br>3 vs 6<br>P <0.001<br>Median duration (days) across 6 cycles 1 vs 6 | Infection rate across 6 cycles<br>6.5% vs 13.3%<br>G-CSF vs placebo: 51% reduction/cycle<br>Mean days of antibiotic use/cycle<br>1.2 vs 2.3<br>RR (placebo vs filgrastim)<br>1.9, 95% CI: 1.44-2.51 | Mean days of hospitalization/cycle)<br>2.3 vs 4.2<br>Relative risk (placebo vs filgrastim)<br>1.55, 95% CI: 1.26-1.91                                     | NA                                                                                             | Median OS (months)<br>11.4 vs 12.2                                                                                | Mild to moderate bone pain 20% vs 0%<br>Mild rashes or Itching 6% vs 6%<br>AE leading to withdrawal request (abdominal pain, diffuse aches and pains, preexisting eczema flare-up) 3 (3%) vs 0 (0%) |
| Acute Myeloid Leukemia (AML) |      |                                                       |    |                                                                                                                                                                                                                               |                                                                                                                                                                                 |                                                                                                                                                                                                     |                                                                                                                                                           |                                                                                                |                                                                                                                   |                                                                                                                                                                                                     |
| Beksac <i>et al</i> ; 2011   | AML  | N= 260<br>Filgrastim: n = 123<br>No Filgrastim: n=137 | NA | Duration of fever, days<br>8 (1.0–27) vs 8.5 (0.0–28) P = 0.96                                                                                                                                                                | NA                                                                                                                                                                              | NA                                                                                                                                                                                                  | Antibacterial therapy<br>91.6% vs 92.4%<br>P = 0.82<br>Antifungal therapy<br>63.0% vs 61.8%<br>P = 0.85<br>Antiviral therapy:<br>8.4% vs 5.3%<br>P = 0.34 | Median duration (range) of hospitalization, days<br>31 (9.0–72.0) vs 35 (3.0–80.0)<br>P = 0.18 | Median OS duration (SD), days<br>239 (81) vs 184 (65)<br>P = 0.38<br>3-year OS (SD)<br>31.8% (5.6) vs 25.6% (5.1) | Frequent AEs in both arms: rash, musculoskeletal pain, and fever                                                                                                                                    |
| Heil <i>et al</i> ; 2006     | AML  | N= 521                                                | NA | NA                                                                                                                                                                                                                            | NA                                                                                                                                                                              | NA                                                                                                                                                                                                  | NA                                                                                                                                                        | NA                                                                                             | 3-year OS (95% CI)                                                                                                | NA                                                                                                                                                                                                  |

|                           |     |                                                       |                                                                                                                                                                                                                                               |                                                                                                                                   |    |                                                                                                                                     |                                                                                                                                     |    |                                                                                                                                                                                                                 |                                                                                                                                                                                                                   |
|---------------------------|-----|-------------------------------------------------------|-----------------------------------------------------------------------------------------------------------------------------------------------------------------------------------------------------------------------------------------------|-----------------------------------------------------------------------------------------------------------------------------------|----|-------------------------------------------------------------------------------------------------------------------------------------|-------------------------------------------------------------------------------------------------------------------------------------|----|-----------------------------------------------------------------------------------------------------------------------------------------------------------------------------------------------------------------|-------------------------------------------------------------------------------------------------------------------------------------------------------------------------------------------------------------------|
|                           |     | Filgrastim: n = 259<br>Placebo: n= 262                |                                                                                                                                                                                                                                               |                                                                                                                                   |    |                                                                                                                                     |                                                                                                                                     |    | 23% (18–29) vs 21% (16–26)<br>5 year OS (95% CI) 19 (15–24) vs 17 (12–22)                                                                                                                                       |                                                                                                                                                                                                                   |
| Usuki <i>et al</i> ; 2002 | AML | N= 245<br>Filgrastim: n = 120<br>No Filgrastim: n=125 | Median (95% CI) time to ANC recovery to 1x10 <sup>9</sup> /L, days<br>14 (13.9–16.0) vs 22 (19.7–22.7)<br>P < 0.0001<br>Median (95% CI) time to ANC recovery to 0.5x10 <sup>9</sup> /L, days<br>12 (1.7–13.5) vs 18 (17.2–20.1)<br>P < 0.0001 | Incidence of fever 76.7% vs 76.0%<br>P = 1.000<br>Median (range) duration of FN, days<br>3 (3.1–4.4) vs 4 (4.1–5.6)<br>P < 0.0001 | NA | Rate of infection 83.3% vs 91.2%<br>P = 0.083<br>Median (95% CI) duration of infection, days<br>11 (8.3) vs 13 (14.0)<br>P = 0.2320 | Rate of IV antibiotic use 81.7% vs 87.2%<br>P = 0.100<br>IV antibiotics use, days (range)<br>16.5 (0–49) vs 17 (0–70)<br>P = 0.7039 | NA | Median DFS, months<br>14.0 vs 12.5<br>DFS probability (95% CI) at 5 years:<br>34.5% (23.8–43.7%) vs 33.6% (23.3–43.9%)<br>P = 0.9407<br>Median OS, months<br>20.8 vs 18.8<br>OS probability (95% CI) at 5 years | G-CSF-related:<br>Mild musculoskeletal pain (3 pts), fever (1 pt), severe skin rash (1 pt)<br>G-CSF association unknown:<br>Sweet's disease (1 pt), chest pain (1 pt), generalized pruritus, and skin rash (1 pt) |

|                                   |     |                                                            |                                                                                                                                                                                     |                                                                                                                                                                                   |                                                                                                                                                     |                                                                                                                                                                                                         |                                                                                                                                                                        |                                                                                                                                                                                                                     |                                                                                                                                             |                                                                                                                   |
|-----------------------------------|-----|------------------------------------------------------------|-------------------------------------------------------------------------------------------------------------------------------------------------------------------------------------|-----------------------------------------------------------------------------------------------------------------------------------------------------------------------------------|-----------------------------------------------------------------------------------------------------------------------------------------------------|---------------------------------------------------------------------------------------------------------------------------------------------------------------------------------------------------------|------------------------------------------------------------------------------------------------------------------------------------------------------------------------|---------------------------------------------------------------------------------------------------------------------------------------------------------------------------------------------------------------------|---------------------------------------------------------------------------------------------------------------------------------------------|-------------------------------------------------------------------------------------------------------------------|
|                                   |     |                                                            |                                                                                                                                                                                     |                                                                                                                                                                                   |                                                                                                                                                     |                                                                                                                                                                                                         |                                                                                                                                                                        |                                                                                                                                                                                                                     | 42.7%<br>(31.4–<br>52.9) vs<br>35.6%<br>(25.9–<br>45.2)<br>P = 0.5918                                                                       |                                                                                                                   |
| Harousseau<br><i>et al</i> ; 2000 | AML | N= 194<br>Filgrastim: n =<br>100<br>No Filgrastim:<br>n=94 | NA                                                                                                                                                                                  | Fever duration<br>(association<br>with<br>neutropenia not<br>specified), days:<br>ICC1:<br>5 (0–23) vs 6 (0–<br>25)<br>P = 0.35<br>ICC2:<br>5 (0–31) vs 6 (0–<br>100)<br>P = 0.70 | Grade 4<br>neutropenia<br>duration,<br>days<br>ICC1:<br>12 (5–45) vs<br>19 (9–39)<br>P < 0.001<br>ICC2:<br>20 (7–56) vs<br>28 (10–100)<br>P < 0.001 | Documented<br>infections:<br>ICC1:<br>55% vs 66%<br>P = 0.16<br>ICC2:<br>40.5% vs<br>55.5%<br>P = 0.07<br>Episodes of<br>septicemias:<br>ICC1: 40% vs<br>48%, P = 0.34<br>ICC2: 25% vs<br>31%, P = 0.05 | Median<br>(range)<br>duration of<br>IV<br>antibiotics,<br>days:<br>ICC1:<br>13 (0–34) vs<br>15 (0–51)<br>P = 0.02<br>ICC2: 15 (0–<br>47) vs 22 (0–<br>100)<br>P = 0.04 | Median (range) time of<br>hospital stay, days:<br>ICC1<br>24 (17–100) vs 27 (16–<br>61)<br>P < 0.001<br>ICC2:<br>29 (19–62) vs 34 (21–<br>100)<br>P < 0.001                                                         | Deaths:<br>27 pts<br>(27%) vs<br>31 pts<br>(33%)<br>2-year OS<br>(SD):<br>64% (6%)<br>vs 63%<br>(6%)                                        | NA                                                                                                                |
| Godwin <i>et al</i> ; 1998        | AML | N= 211<br>Filgrastim: n =<br>106<br>Placebo: n=105         | ANC<br>recovery<br>(time from<br>chemother<br>apy start<br>until<br>neutrophil<br>count >500<br>/μL, days:<br>24 (75/104<br>pts<br>recovered)<br>vs 27<br>(74/103 pts<br>recovered) | NA                                                                                                                                                                                | 15% (95% CI:<br>3–27) shorter<br>neutropenia<br>duration<br>with<br>filgrastim<br>P = 0.014<br>No<br>difference in<br>thrombocyto<br>penia          | Number of<br>≥3 culture<br>confirmed<br>infections<br>21% vs 21%<br>P = 0.82 one-<br>tailed                                                                                                             | Median<br>(range)<br>days on<br>antibiotics<br>22 (0–128)<br>vs 26 (0–69)<br>P = 0.053<br>one-tailed                                                                   | Median (range) length<br>of first hospitalization,<br>days<br>29 (4–155) vs 29 (3–106)<br>Median (range) # of<br>febrile days during the<br>first hospitalization:<br>8 (0–79) vs 10 (0–34)<br>P = 0.091 one-tailed | Median<br>survival<br>(95% CI)<br>months<br>6 (3–8) vs<br>9 (7–10)<br>P = 0.71<br>RFS,<br>months<br>8 (4–10)<br>vs 9 (7–<br>10)<br>P = 0.38 | Bone pain: 1 pt (1%)<br>vs 5 pts (5%)<br>Fatal induction<br>toxicities<br>20% (21/104 pts) vs<br>19% (20/103 pts) |

|                              |     |                                                       |                                                                                                                     |                                                                                                                                                 |                                                                                                                                                          |                                                         |                                                                                                                    |                                                                                                                                                                      |                                                                                                                                                                                                             |                                                                        |
|------------------------------|-----|-------------------------------------------------------|---------------------------------------------------------------------------------------------------------------------|-------------------------------------------------------------------------------------------------------------------------------------------------|----------------------------------------------------------------------------------------------------------------------------------------------------------|---------------------------------------------------------|--------------------------------------------------------------------------------------------------------------------|----------------------------------------------------------------------------------------------------------------------------------------------------------------------|-------------------------------------------------------------------------------------------------------------------------------------------------------------------------------------------------------------|------------------------------------------------------------------------|
| Heil <i>et al</i> ;<br>1997  | AML | N= 521<br>Filgrastim: n = 259<br>No Filgrastim: n=262 | Time to ANC recovery<br>Kaplan-Meier median (95% CI) days for induction 1<br>20 (19–20) vs 25 (24–27)<br>P = 0.0001 | Fever incidence<br>Induction 1<br>91% vs 92%<br>P = 0.50<br>Induction 2<br>80% vs 75%<br>P = 0.47<br>Consolidation 1<br>49% vs 63%<br>P = 0.014 | Median (range) duration of neutropenia, days<br>Induction 2: 10 (0–38) vs 14 (0–43)<br>P = 0.015<br>Consolidation 1: 4 (0–46) vs 11 (0–22)<br>P = 0.0001 | Infection rate in induction 1<br>37% vs 36%<br>P = 0.85 | Use of antibacterials:<br>Induction 1: 95% vs 96%<br>Use of anti-infectives<br>Induction 1: 95% vs 96%<br>P = 0.81 | Median (range) hospital stay, days<br>Induction therapy: 23 (2–104) vs 29 (7–93) P = 0.0001<br>Induction and consolidation: 42 (15–140) vs 55 (23–114)<br>P = 0.0001 | Median survival (95% CI), months<br>DFS: 10.1 (8.2–11.4) vs 9.4 (8.2–11.1)<br>P = 0.99<br>OS: 12.5 (10.9–14.4) vs 14.0 (12.2–15.6)<br>P = 0.83<br>Deaths in induction phase: 21 pts (8.1%) vs 25 pts (9.5%) | AEs in induction 1<br>Rash: 3% vs 2%<br>Musculoskeletal pain: 2% vs 1% |
| Moore <i>et al</i> ;<br>1997 | AML | N= 123<br>Filgrastim: n = 61<br>No Filgrastim: n=62   | Median days to recovery (95% CI) ANC<br>≥500/μL<br>20.5 (19–24) vs 31.1 (31–36)<br>P < 0.001                        | NA                                                                                                                                              | NA                                                                                                                                                       | Grade ≥3 infections:<br>58% and 47% vs 71% and 75%      | NA                                                                                                                 | Incidence of hospitalization<br>47 pts (85%) vs 56 pts (97%)<br>P = 0.05<br>Duration of hospitalization<br>24 (6–44) and 20 (1–58) vs 40 (11–91) and 30 (2–80)       | Median survival of pts who received third intensification course, years<br>3.4 vs 2.4<br>Death                                                                                                              | NA                                                                     |

|  |  |  |                                                               |  |  |  |  |  |                   |  |
|--|--|--|---------------------------------------------------------------|--|--|--|--|--|-------------------|--|
|  |  |  | Platelets<br>≥20000/uL<br>23.4 (19–<br>31) vs 30.2<br>(26–38) |  |  |  |  |  | 3 pts vs 3<br>pts |  |
|--|--|--|---------------------------------------------------------------|--|--|--|--|--|-------------------|--|

**Abbreviations:** AE= Adverse Event; ANC= Absolute neutrophil count; AML= Acute Myeloid Leukemia; ALL= Acute lymphoblastic leukemia; BEP/EP= Cisplatin, etoposide, bleomycin; CADO= cyclophosphamide, vincristine and doxorubicin; CHOP= Cyclophosphamide, doxorubicin, vincristine, prednisolone; CNOP= Cyclophosphamide, mitoxantrone, vincristine, prednisolone; DFS= Disease free survival; FEC-D= Fluorouracil, Epirubicin, Cyclophosphamide, and Docetaxel; FN= Febrile Neutropenia; G-CSF= Granulocyte- colony stimulating factor; GCM= Germ cell malignancy; IQR= Inter-quartile range; NA= Not available; NHL= Non-Hodgkin Lymphoma; NSCLC= Non-small cell lung cancer; OR= Odds Ratio; OS: overall survival; PP= Primary Prophylaxis; RDI= Relative dose intensity; SCLC= Small-cell lung carcinoma; SD= Standard Deviation.

**Table S12.** Key characteristics of studies that compared Filgrastim with Pegfilgrastim by indication and study type.

|                                        |               |                                                                             | Efficacy and Effectiveness                                                                                                                                |                                                                                                                 |                                                                                                                                                                                                                                                                                                                                                                     |                                        |                                        |                                     | Safety              |                                                                                                                                                                                                                                                    |
|----------------------------------------|---------------|-----------------------------------------------------------------------------|-----------------------------------------------------------------------------------------------------------------------------------------------------------|-----------------------------------------------------------------------------------------------------------------|---------------------------------------------------------------------------------------------------------------------------------------------------------------------------------------------------------------------------------------------------------------------------------------------------------------------------------------------------------------------|----------------------------------------|----------------------------------------|-------------------------------------|---------------------|----------------------------------------------------------------------------------------------------------------------------------------------------------------------------------------------------------------------------------------------------|
| Auth or; Year                          | Cancer Type   | Patients (N)                                                                | Time to ANC or platelet recovery                                                                                                                          | Incidence/ Duration of FN                                                                                       | Incidence/ Duration of grade 3 or 4 neutropenia                                                                                                                                                                                                                                                                                                                     | Incidence of infection/ antibiotic use | Incidence/ Duration of Hospitalization | RDI, Dose Delays or dose reductions | Survival/ mortality | AE                                                                                                                                                                                                                                                 |
| Chemotherapy-Induced Neutropenia (CIN) |               |                                                                             |                                                                                                                                                           |                                                                                                                 |                                                                                                                                                                                                                                                                                                                                                                     |                                        |                                        |                                     |                     |                                                                                                                                                                                                                                                    |
| Fengrui et al; 2019                    | Breast Cancer | N= 339<br>Filgrastim: n = 113<br>MPEG 110 µg/kg: n= 113<br>MPEG 6mg: n= 113 | Baseline ANC (±SD)<br>4.21±1.70 in mecapegfilgrastim 100 µg/kg group,<br>4.18±1.57 in mecapegfilgrastim 6 mg group, and 4.17±1.72 in the filgrastim group | Incidence of FN 2% vs. 5% vs. 0 %<br>(filgrastim vs. mecapegfilgrastim 100 µg/kg vs. mecapegfilgrastim 6 mg/kg) | Mean duration of grade ≥ 3 neutropenia in cycle 1<br>1.06 days in mecapegfilgrastim 100 µg/kg group, 1.23 days in mecapegfilgrastim 6 mg group, and 2.06 days in the filgrastim group<br><br>Incidence of grade ≥3 and grade 4 neutropenia in cycle 1<br>66.36% vs. 50.45% vs. 50.91%<br>(filgrastim vs. mecapegfilgrastim 100 µg/kg vs. mecapegfilgrastim 6 mg/kg) | NA                                     | NA                                     | NA                                  | NA                  | In total 98.18% vs. 94.5% vs. 97.2% patient experienced AEs<br><br>Thrombocytopenia: 5% vs. 5% vs. 12%<br>P >0.05<br><br>Back Pain 1% vs. 3% vs. 1%<br>P >0.05<br>Fatigue 9% vs. 16% vs. 14%<br>P >0.05<br>Muscle pain 1% vs. 7% vs. 6%<br>P >0.05 |
| Kubota et al; 2016                     | NHL or HL     | N= 111<br>Filgrastim: n = 56<br>Pegfilgrastim: n= 55                        | -                                                                                                                                                         | Incidence of FN 55.6% vs. 56.6%                                                                                 | Mean duration of severe neutropenia was 4.7 days vs. 4.5 days<br>P < 0.001                                                                                                                                                                                                                                                                                          | NA                                     | NA                                     | NA                                  | NA                  | Vomiting 2% vs. 15%<br>Back Pain 29.1% vs. 22.2%<br>Bone Pain 9.1% vs. 0%<br>Platelet count decreased                                                                                                                                              |



|                                  |                  |                                                                                                                  |                                                                                         |                                                                                                                                                                |                                                                                                                                                       |    |                                                                  |    |    |                                                                                                                                                                                              |
|----------------------------------|------------------|------------------------------------------------------------------------------------------------------------------|-----------------------------------------------------------------------------------------|----------------------------------------------------------------------------------------------------------------------------------------------------------------|-------------------------------------------------------------------------------------------------------------------------------------------------------|----|------------------------------------------------------------------|----|----|----------------------------------------------------------------------------------------------------------------------------------------------------------------------------------------------|
|                                  |                  |                                                                                                                  |                                                                                         |                                                                                                                                                                |                                                                                                                                                       |    |                                                                  |    |    | 100% vs. 98.1%<br>Pyrexia 25.5%<br>vs. 22.2%                                                                                                                                                 |
| Park<br><i>et al</i> ;<br>2016   | Breast<br>Cancer | N= 74<br>Filgrastim: n = 38<br>DA 3031: n= 36                                                                    | -                                                                                       | Incidence of FN<br>7.9% vs. 17.1%                                                                                                                              | Mean duration of Grade 4<br>neutropenia in cycle 1 $2.08 \pm 0.85$ days for the filgrastim<br>group and $2.28 \pm 1.14$ days for<br>the DA-3031 group | NA | Incidence of<br>hospitalization<br>36.8% vs. 37.1%<br>P = 0.9788 | NA | NA | Severe AEs<br>reported in both<br>groups were<br>94.7% vs. 97.2%<br><br>Serious AEs<br>15.8% vs. 27.8%                                                                                       |
| Filon<br><i>et al</i> ;<br>2015  | Breast<br>Cancer | N= 135<br>Filgrastim: n =<br>45<br>EPEG 6 mg/kg;<br>n= 45<br>EPEG 7.5 mg;<br>n= 45                               | -                                                                                       | Incidence of FN<br>in all cycles<br>2.5% vs. 2.38%<br>vs. 6.98%<br><br>Incidence of<br>severe<br>neutropenia in<br>all cycles<br>100% vs. 95.24%<br>vs. 79.07% | Mean duration of grade 4<br>neutropenia was 1,725 days vs.<br>0,905 days vs. 0,791 days                                                               | NA | NA                                                               | NA | NA | myalgia 7.14%<br>vs. 4.65% vs.<br>4.65%,<br>arthralgia<br>14.29% vs.<br>6.98% vs. 6.98%,<br>ossalgia 9.52%<br>vs. 9.30% vs.<br>4.65%,<br>local reactions<br>7.14% vs.<br>2.33% vs.<br>2.33%) |
| Zhan<br>g <i>et al</i> ;<br>2015 | Breast<br>Cancer | N= 171<br>Filgrastim: n =<br>43<br>PEG 60 µg<br>/kg: n= 43<br>PEG 100<br>µg/kg: n= 43<br>PEG 120<br>µg/kg: n= 42 | Time to ANC<br>recovery 1.26<br>days vs. 1.49<br>days vs. 1.16<br>days vs. 1.24<br>days | Incidence of FN<br>11.63% vs.<br>6.98% vs. 4.65%<br>vs. 11.90%                                                                                                 | Mean duration of grade 3+<br>neutropenia 1.69 days vs. 2.09<br>days vs. 1.53 days vs 1.73 days<br>P = 0.043                                           | NA | NA                                                               | NA | NA | AEs in total<br>90.70% vs.<br>95.35% vs.<br>90.70% vs.<br>92.86%<br><br>Bone Pain<br>16.28% vs.<br>4.65% vs. 4.65%<br>vs. 9.52%                                                              |
| Park<br><i>et al</i> ;<br>2013   | Breast<br>Cancer | N= 61<br>Filgrastim: n =<br>21                                                                                   | Time to ANC<br>recovery $9.8 \pm 0.8$<br>vs. $10.1 \pm 1.8$ vs.<br>$9.9 \pm 1.6$        | Incidence of FN<br>9.5% vs. 15% vs.<br>5%                                                                                                                      | Mean duration of G4<br>neutropenia $2.48 \pm 1.03$ days vs.<br>$2.20 \pm 1.47$ days vs. $2.05 \pm 1.05$<br>days                                       | NA | NA                                                               | NA | NA | Musculoskeletal<br>and<br>connective<br>tissue disorders                                                                                                                                     |

|                     |               |                                                                           |                                            |                                                                                  |                                                                                 |                                            |                             |    |    |                                                                                                                                                                |
|---------------------|---------------|---------------------------------------------------------------------------|--------------------------------------------|----------------------------------------------------------------------------------|---------------------------------------------------------------------------------|--------------------------------------------|-----------------------------|----|----|----------------------------------------------------------------------------------------------------------------------------------------------------------------|
|                     |               | DA-3031 3.6 mg: n= 20<br>DA-3031 6 mg : n= 20                             |                                            |                                                                                  | P= 0.275                                                                        |                                            |                             |    |    | 28.6% vs. 21.1% vs. 38.1%<br>P = 0.495<br><br>Back Pain 14.3% vs. 28.6% (DA-3031 6 mg)<br><br>Nervous system disorder 9.5% vs. 5.3% (DA-3031 6 mg)<br>P= 0.522 |
| Salafet et al; 2013 | Breast Cancer | N= 60<br>Filgrastim: n = 19<br>BCD 017 3 mg: n= 21<br>BCD 017 6 mg: n= 20 | -                                          | Incidence of severe neutropenia in 1 <sup>st</sup> cycle 61.1% vs. 85.7% vs. 65% | Mean duration of grade 4 neutropenia in cycle 1 was 0.33 days vs. 0.43 vs. 0.40 | NA                                         | NA                          | NA | NA | NA                                                                                                                                                             |
| Green et al; 2003   | Breast Cancer | N= 152<br>Filgrastim : 75<br>Pegfilgrastim: 77                            | Time to ANC recovery 9 days for both group | Incidence of FN 15% vs 9%                                                        | Mean duration of grade 4 neutropenia in cycle 1 was 1.6 days vs 1.8 days        | i.v. antibiotic administration 21% and 17% | Hospitalization 31% and 18% | NA | NA | 58% vs 57% patients experienced one of AE<br>Bone pain 42% vs 37%<br>grade 4 anemia 4% vs 0% and grade 4 thrombocytopenia 1% vs 0%                             |
| Grigg et al; 2003   | NHL           | N= 50<br>Filgrastim : 22<br>Pegfilgrastim: 27                             |                                            | Incidence of FN in cycle 1 was 0% vs 15%                                         | Mean duration of grade 4 neutropenia in cycle 1 was 0.8 days vs 1.5 days        | NA                                         | NA                          | NA | NA | Adverse events (WHO grade 1–4) were reported by 95%                                                                                                            |

|                              |                                  |                                                                                                    |                                                                              |                                          |                                                                                                                                                        |    |    |    |                        |                                                                                                                            |
|------------------------------|----------------------------------|----------------------------------------------------------------------------------------------------|------------------------------------------------------------------------------|------------------------------------------|--------------------------------------------------------------------------------------------------------------------------------------------------------|----|----|----|------------------------|----------------------------------------------------------------------------------------------------------------------------|
|                              |                                  |                                                                                                    |                                                                              |                                          |                                                                                                                                                        |    |    |    |                        | of filgrastim and 96% of pegfilgrastim patients. Bone pain 50% vs 30%                                                      |
| Vose <i>et al</i> ; 2003     | Relapsed or refractory HL or NHL | N= 60<br>Filgrastim : 31<br>Pegfilgrastim: 29                                                      | Mean ANC nadir was 0.208 x 10 <sup>9</sup> /L vs. 0.161 x 10 <sup>9</sup> /L | Incidence of FN 19% vs. 21%              | Incidence of grade 4 neutropenia 68% vs. 69%<br><br>Mean duration of grade 4 neutropenia 2.4 days vs. 2.8 days                                         | NA | NA | NA | Deaths overall 5 vs. 3 | Fatigue 19% vs. 14%<br>Thrombocytopenia 6% vs. 14%<br>Anemia 13% vs. 3%<br>Fever 10% vs. 3%<br>Granulocytopenia 13% vs. 3% |
| Holmes <i>et al</i> ; 2002   | Breast Cancer                    | N= 296<br>Filgrastim : 147<br>Pegfilgrastim: 149                                                   | Mean time to ANC recovery 9.7 days vs. 9.3 days                              | Incidence of FN overall 18% vs. 9%       | Incidence of grade 4 neutropenia in cycle 1 79% vs. 77%<br><br>Mean duration of grade 4 neutropenia 1.8 days vs. 1.7 days                              | NA | NA | NA | NA                     | Skeletal pain 26% vs. 25%<br>Serious AEs 20% vs. 19%                                                                       |
| Holmes <i>et al</i> ; 2002   | Breast Cancer                    | N= 125<br>Filgrastim: n= 25<br>PEG 30 µg /kg; n= 19<br>PEG 60 µg/kg; n= 60<br>PEG 100 µg/kg; n= 46 | Mean time to ANC recovery 9.4 days vs. 11 days vs. 10.3 days vs. 9.5 days    | Incidence of FN 4% vs. 21% vs. 8% vs. 7% | Incidence of grade 4 neutropenia 76% vs. 95% vs. 90% vs. 74%<br><br>Mean duration of grade 4 neutropenia 1.6 days vs. 2.7 days vs. 2 days vs. 1.3 days | NA | NA | NA | NA                     | Bone Pain 36% vs. 35%                                                                                                      |
| Acute Myeloid Leukemia (AML) |                                  |                                                                                                    |                                                                              |                                          |                                                                                                                                                        |    |    |    |                        |                                                                                                                            |
| Sierra <i>et al</i> ; 2008   | AML                              | N= 83<br>Filgrastim: n= 41<br>Pegfilgrastim: n= 42                                                 | Median time to ANC recovery was 16.5 days vs. 17.0 days                      | Incidence of FN 88% vs. 81%              | Fever 58% vs 77%                                                                                                                                       | NA | NA | NA | Deaths 2 vs 1          | Bone pain 10% vs 7%                                                                                                        |

**Table S13.** Key characteristics of studies that compared Filgrastim with Biosimilar Filgrastim by indication and study type.

|                                        |                  |                                                                              | Efficacy and Effectiveness             |                                                               |                                                                 |                                                 |                                              |                                                 | Safety                 |                                                                                                                                       |
|----------------------------------------|------------------|------------------------------------------------------------------------------|----------------------------------------|---------------------------------------------------------------|-----------------------------------------------------------------|-------------------------------------------------|----------------------------------------------|-------------------------------------------------|------------------------|---------------------------------------------------------------------------------------------------------------------------------------|
| Author;<br>Year                        | Cancer<br>Type   | Patients (N)                                                                 | Time to ANC<br>or Platelet<br>Recovery | Incidence/<br>Duration of FN                                  | Incidence/<br>Duration of<br>Grade 3 or 4<br>Neutropenia        | Incidence of<br>Infection/<br>Antibiotic<br>Use | Incidence/<br>Duration of<br>Hospitalization | RDI,<br>Dose<br>Delays<br>or Dose<br>Reductions | Survival/<br>mortality | AE                                                                                                                                    |
| Chemotherapy-Induced Neutropenia (CIN) |                  |                                                                              |                                        |                                                               |                                                                 |                                                 |                                              |                                                 |                        |                                                                                                                                       |
| Blackwell<br><i>et al</i> ; 2018       | Breast<br>Cancer | N= 213<br>Filgrastim: n = 51<br>Switched biosimilar: n= 109<br>EP2006: n= 53 | -                                      | Incidence of FN across cycles 2-6 <sup>d</sup><br>0% vs. 3.4% | NA                                                              | Infections 9.9% vs. 9.3%                        | Hospitalization 0 vs. 1                      | NA                                              | NA                     | Treatment related AEs 39.2% vs. 42.1%<br>Musculoskeletal/connective tissue Disorders 39.2% vs. 35.5%<br><br>Bone pain 33.3% vs. 30.8% |
| Hegg <i>et al</i> ; 2016               | Breast<br>Cancer | N= 217<br>Filgrastim: n= 108<br>Biosimilar filgrastim: n= 109                | -                                      | Rate of FN 2.38% vs. 3.49%<br>P= 0.669                        | Patients with Grade 4 neutropenia 54.6 % vs. 51.4%<br>P= 0.6311 | NA                                              | NA                                           | NA                                              | NA                     | Mild to moderate AEs 105 pt. vs. 101pts.<br><br>Serious AE 6 pt. vs. 3 pt.                                                            |

|                                   |                  |                                                                          |                                                                                                                        |                                                  |                                                                                                                        |                           |    |    |                                                                                                                                      |                                                                                                                                                                                                                                             |
|-----------------------------------|------------------|--------------------------------------------------------------------------|------------------------------------------------------------------------------------------------------------------------|--------------------------------------------------|------------------------------------------------------------------------------------------------------------------------|---------------------------|----|----|--------------------------------------------------------------------------------------------------------------------------------------|---------------------------------------------------------------------------------------------------------------------------------------------------------------------------------------------------------------------------------------------|
| Blackwell<br><i>et al</i> ; 2015  | Breast<br>Cancer | N= 214<br>Filgrastim: n= 107<br>EP 2006: n= 107                          | Time to ANC<br>recovery<br>(median) was<br>reference<br>(range: 0-4)<br>and 2.0 days<br>for biosimilar<br>(range: 0-6) | NA                                               | Fever 2.8% vs.<br>6.6%<br><br>Grade $\frac{3}{4}$<br>neutropenia<br>79% vs. 77%                                        | NA                        | NA | NA | NA                                                                                                                                   | Treatment<br>related AEs<br>19.6% vs.<br>20.6%                                                                                                                                                                                              |
| Waller <i>et al</i> ; 2010        | Breast<br>Cancer | N= 278<br>Filgrastim: n= 95<br>Biosimilar<br>filgrastim: n= 183          | -                                                                                                                      | Incidence of FN in<br>cycle 1-3<br>2.4% vs. 2.4% | Incidence of<br>severe<br>neutropenia in<br>cycle 1<br>68.2% vs.<br>77.6%                                              | Infections 3.5%<br>vs. 3% | NA | NA | NA                                                                                                                                   | In both<br>treatment<br>groups, the<br>most common<br>treatment-<br>emergent AEs<br>of any grade<br>were nausea,<br>fatigue, and<br>bone pain.<br>Any AE 84.2%<br>vs. 86.9%<br>Bone Pain<br>16.8% vs.<br>26.2%<br>Myalgia 9.5%<br>vs. 14.2% |
| del Giglio<br><i>et al</i> ; 2008 | Breast<br>Cancer | N= 348<br>Filgrastim: n = 136<br>XM02: n= 140<br>Placebo/<br>XM02: n= 72 | -                                                                                                                      | FN incidence<br>20.7% vs 22.1% vs<br>41.7%       | Mean<br>duration<br>(days) of<br>severe<br>neutropenia<br>Cycle 1<br>1.1 vs 1.1 vs 3.8<br>Cycle 4<br>0.7 vs 0.7 vs 0.6 | NA                        | NA | NA | 3 deaths<br>in cycle 1<br>1 sepsis<br>and 1<br>cardiores-<br>piratory<br>arrest in<br>placebo;<br>1<br>ischemic<br>stroke in<br>XM02 | Most<br>commonly<br>reported drug-<br>related AEs<br>bone pain<br>(10.3%)<br>asthenia (7.8%)<br>myalgia (6.3%)<br>diarrhea<br>(5.2%)                                                                                                        |

|                                        |                  |                                                                              | Efficacy and Effectiveness             |                                                               |                                                                 |                                              |                                              |                                                 | Safety                 |                                                                                                                                       |
|----------------------------------------|------------------|------------------------------------------------------------------------------|----------------------------------------|---------------------------------------------------------------|-----------------------------------------------------------------|----------------------------------------------|----------------------------------------------|-------------------------------------------------|------------------------|---------------------------------------------------------------------------------------------------------------------------------------|
| Author;<br>Year                        | Cancer<br>Type   | Patients (N)                                                                 | Time to ANC<br>or platelet<br>recovery | Incidence/<br>Duration of FN                                  | Incidence/<br>Duration of<br>grade 3 or 4<br>neutropenia        | Incidence of<br>infection/<br>antibiotic use | Incidence/<br>Duration of<br>Hospitalization | RDI,<br>Dose<br>Delays<br>or dose<br>reductions | Survival/<br>mortality | AE                                                                                                                                    |
| Chemotherapy-Induced Neutropenia (CIN) |                  |                                                                              |                                        |                                                               |                                                                 |                                              |                                              |                                                 |                        |                                                                                                                                       |
| Blackwell<br><i>et al</i> ; 2018       | Breast<br>Cancer | N= 213<br>Filgrastim: n = 51<br>Switched biosimilar: n= 109<br>EP2006: n= 53 | -                                      | Incidence of FN across cycles 2-6 <sup>d</sup><br>0% vs. 3.4% | NA                                                              | Infections 9.9% vs. 9.3%                     | Hospitalization 0 vs. 1                      | NA                                              | NA                     | Treatment related AEs 39.2% vs. 42.1%<br>Musculoskeletal/connective tissue Disorders 39.2% vs. 35.5%<br><br>Bone pain 33.3% vs. 30.8% |
| Hegg <i>et al</i> ; 2016               | Breast<br>Cancer | N= 217<br>Filgrastim: n= 108<br>Biosimilar filgrastim: n= 109                | -                                      | Rate of FN 2.38% vs. 3.49%<br>P= 0.669                        | Patients with Grade 4 neutropenia 54.6 % vs. 51.4%<br>P= 0.6311 | NA                                           | NA                                           | NA                                              | NA                     | Mild to moderate AEs 105 pt. vs. 101pts.<br><br>Serious AE 6 pt. vs. 3 pt.                                                            |

|                                   |                  |                                                                          |                                                                                                                        |                                                  |                                                                                                                        |                           |    |    |                                                                                                                                      |                                                                                                                                                                                                                                             |
|-----------------------------------|------------------|--------------------------------------------------------------------------|------------------------------------------------------------------------------------------------------------------------|--------------------------------------------------|------------------------------------------------------------------------------------------------------------------------|---------------------------|----|----|--------------------------------------------------------------------------------------------------------------------------------------|---------------------------------------------------------------------------------------------------------------------------------------------------------------------------------------------------------------------------------------------|
| Blackwell<br><i>et al</i> ; 2015  | Breast<br>Cancer | N= 214<br>Filgrastim: n= 107<br>EP 2006: n= 107                          | Time to ANC<br>recovery<br>(median) was<br>reference<br>(range: 0-4)<br>and 2.0 days<br>for biosimilar<br>(range: 0-6) | NA                                               | Fever 2.8% vs.<br>6.6%<br><br>Grade <sup>3/4</sup><br>neutropenia<br>79% vs. 77%                                       | NA                        | NA | NA | NA                                                                                                                                   | Treatment<br>related AEs<br>19.6% vs.<br>20.6%                                                                                                                                                                                              |
| Waller <i>et al</i> ; 2010        | Breast<br>Cancer | N= 278<br>Filgrastim: n= 95<br>Biosimilar<br>filgrastim: n= 183          | -                                                                                                                      | Incidence of FN in<br>cycle 1-3<br>2.4% vs. 2.4% | Incidence of<br>severe<br>neutropenia in<br>cycle 1<br>68.2% vs.<br>77.6%                                              | Infections 3.5%<br>vs. 3% | NA | NA | NA                                                                                                                                   | In both<br>treatment<br>groups, the<br>most common<br>treatment-<br>emergent AEs<br>of any grade<br>were nausea,<br>fatigue, and<br>bone pain.<br>Any AE 84.2%<br>vs. 86.9%<br>Bone Pain<br>16.8% vs.<br>26.2%<br>Myalgia 9.5%<br>vs. 14.2% |
| del Giglio<br><i>et al</i> ; 2008 | Breast<br>Cancer | N= 348<br>Filgrastim: n = 136<br>XM02: n= 140<br>Placebo/<br>XM02: n= 72 | -                                                                                                                      | FN incidence<br>20.7% vs 22.1% vs<br>41.7%       | Mean<br>duration<br>(days) of<br>severe<br>neutropenia<br>Cycle 1<br>1.1 vs 1.1 vs 3.8<br>Cycle 4<br>0.7 vs 0.7 vs 0.6 | NA                        | NA | NA | 3 deaths<br>in cycle 1<br>1 sepsis<br>and 1<br>cardiores-<br>piratory<br>arrest in<br>placebo;<br>1<br>ischemic<br>stroke in<br>XM02 | Most<br>commonly<br>reported drug-<br>related AEs<br>bone pain<br>(10.3%)<br>asthenia (7.8%)<br>myalgia (6.3%)<br>diarrhea<br>(5.2%)                                                                                                        |

| Studies                     | Random sequence generation (selection bias) | Allocation concealment (selection bias) | Blinding of participants and personnel (performance bias) | Blinding of outcome assessment (detection bias) | Incomplete outcome data (attrition bias) | Selective reporting (reporting bias) | Other bias |
|-----------------------------|---------------------------------------------|-----------------------------------------|-----------------------------------------------------------|-------------------------------------------------|------------------------------------------|--------------------------------------|------------|
| Crawford et al; 2005        | ⚠                                           | ?                                       | ⚠                                                         | ⚠                                               | ⚠                                        | ⚠                                    | ⚠          |
| Timmer-Bonte et al; 2005    | ?                                           | ?                                       | ⚠                                                         | ?                                               | ⚠                                        | ⚠                                    | ⚠          |
| Doorduijn et al; 2003       | ?                                           | ?                                       | ?                                                         | ?                                               | ⚠                                        | ⚠                                    | ⚠          |
| Osby et al; 2003            | ?                                           | ?                                       | ?                                                         | ?                                               | ⚠                                        | ⚠                                    | ⚠          |
| Papaldo et al; 2003         | ?                                           | ?                                       | ?                                                         | ⚠                                               | ⚠                                        | ?                                    | ⚠          |
| Fossa et al; 1998           | ?                                           | ?                                       | ?                                                         | ?                                               | ⚠                                        | ⚠                                    | ⚠          |
| Larson et al; 1998          | ⚠                                           | ?                                       | ⚠                                                         | ?                                               | ⚠                                        | ⚠                                    | ⚠          |
| Michon et al; 1998          | ⚠                                           | ?                                       | ⚠                                                         | ?                                               | ⚠                                        | ⚠                                    | ⚠          |
| Geissler et al; 1997        | ?                                           | ?                                       | ?                                                         | ?                                               | ⚠                                        | ⚠                                    | ⚠          |
| Pui et al; 1997             | ?                                           | ?                                       | ?                                                         | ?                                               | ⚠                                        | ⚠                                    | ⚠          |
| Zinzani et al; 1997         | ?                                           | ?                                       | ?                                                         | ?                                               | ⚠                                        | ⚠                                    | ⚠          |
| Maher et al; 1994           | ⚠                                           | ?                                       | ⚠                                                         | ⚠                                               | ⚠                                        | ⚠                                    | ⚠          |
| Trillet-Lenoir et al; 1993  | ?                                           | ?                                       | ⚠                                                         | ⚠                                               | ⚠                                        | ⚠                                    | ⚠          |
| Crawford et al; 1991        | ⚠                                           | ?                                       | ⚠                                                         | ⚠                                               | ⚠                                        | ⚠                                    | ⚠          |
| Beksac et al; 2011          | ⚠                                           | ⚠                                       | ?                                                         | ⚠                                               | ⚠                                        | ⚠                                    | ⚠          |
| Heil et al; 2006            | ?                                           | ?                                       | ⚠                                                         | ?                                               | ⚠                                        | ⚠                                    | ⚠          |
| Usuki et al; 2002           | ⚠                                           | ?                                       | ?                                                         | ?                                               | ⚠                                        | ⚠                                    | ⚠          |
| Harousseau et al; 2000      | ⚠                                           | ?                                       | ?                                                         | ?                                               | ⚠                                        | ⚠                                    | ⚠          |
| Godwin et al; 1998          | ⚠                                           | ?                                       | ⚠                                                         | ⚠                                               | ⚠                                        | ⚠                                    | ⚠          |
| Heil et al; 1997            | ?                                           | ?                                       | ⚠                                                         | ?                                               | ⚠                                        | ⚠                                    | ⚠          |
| Dale et al; 1993            | ⚠                                           | ?                                       | ⚠                                                         | ⚠                                               | ⚠                                        | ⚠                                    | ⚠          |
| Gonzalez-Vicent et al; 2004 | ⚠                                           | ?                                       | ⚠                                                         | ?                                               | ⚠                                        | ⚠                                    | ⚠          |
| Stahel et al; 1997          | ?                                           | ?                                       | ⚠                                                         | ?                                               | ⚠                                        | ⚠                                    | ⚠          |
| Fengrui et al; 2019         | ⚠                                           | ?                                       | ⚠                                                         | ⚠                                               | ⚠                                        | ⚠                                    | ⚠          |
| Kubo et al; 2016            | ⚠                                           | ?                                       | ⚠                                                         | ?                                               | ⚠                                        | ⚠                                    | ⚠          |
| Park et al; 2017            | ⚠                                           | ?                                       | ⚠                                                         | ?                                               | ⚠                                        | ⚠                                    | ⚠          |
| Filon et al; 2015           | ⚠                                           | ?                                       | ⚠                                                         | ⚠                                               | ⚠                                        | ⚠                                    | ⚠          |
| Zhang et al; 2015           | ⚠                                           | ?                                       | ?                                                         | ?                                               | ⚠                                        | ⚠                                    | ⚠          |
| Park et al; 2013            | ⚠                                           | ?                                       | ⚠                                                         | ?                                               | ⚠                                        | ⚠                                    | ⚠          |
| Salafet et al; 2013         | ⚠                                           | ?                                       | ⚠                                                         | ?                                               | ⚠                                        | ⚠                                    | ⚠          |
| Green et al; 2003           | ⚠                                           | ⚠                                       | ⚠                                                         | ?                                               | ⚠                                        | ⚠                                    | ⚠          |
| Grigg et al; 2003           | ?                                           | ?                                       | ⚠                                                         | ?                                               | ⚠                                        | ⚠                                    | ⚠          |
| Vose et al; 2003            | ?                                           | ?                                       | ⚠                                                         | ?                                               | ⚠                                        | ⚠                                    | ⚠          |
| Holmes et al; 2002          | ?                                           | ?                                       | ⚠                                                         | ⚠                                               | ⚠                                        | ⚠                                    | ⚠          |
| Holmes et al; 2002          | ?                                           | ?                                       | ⚠                                                         | ⚠                                               | ⚠                                        | ⚠                                    | ⚠          |
| Sierra et al; 2008          | ⚠                                           | ⚠                                       | ⚠                                                         | ⚠                                               | ⚠                                        | ⚠                                    | ⚠          |
| Blackwell et al; 2018       | ?                                           | ⚠                                       | ⚠                                                         | ⚠                                               | ⚠                                        | ⚠                                    | ⚠          |
| Blackwell et al; 2015       | ⚠                                           | ⚠                                       | ⚠                                                         | ⚠                                               | ⚠                                        | ⚠                                    | ⚠          |
| Hegg et al; 2016            | ?                                           | ?                                       | ⚠                                                         | ?                                               | ⚠                                        | ⚠                                    | ⚠          |
| Waller et al; 2010          | ⚠                                           | ?                                       | ⚠                                                         | ⚠                                               | ⚠                                        | ⚠                                    | ⚠          |
| Engert et al; 2009          | ?                                           | ⚠                                       | ⚠                                                         | ⚠                                               | ⚠                                        | ⚠                                    | ⚠          |
| del Giglio et al; 2008      | ?                                           | ⚠                                       | ⚠                                                         | ⚠                                               | ⚠                                        | ⚠                                    | ⚠          |

**Figure S1.** Cochrane Collaboration Risk of Bias Assessment Tool version 2 (RoB 2).



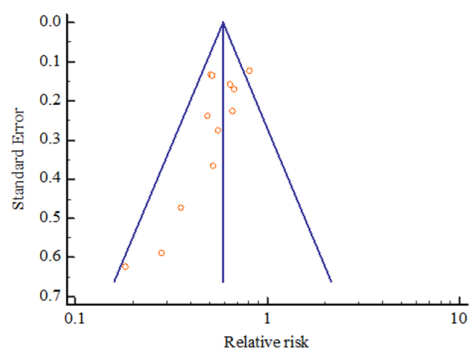

(a).

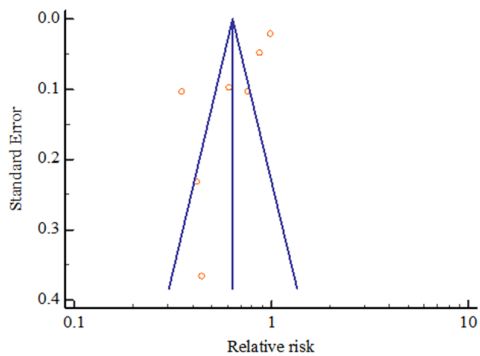

(b)

**Figure S2.** Funnel Plots for Filgrastim versus Placebo/ No treatment. **(a).** Febrile Neutropenia; **(b)** Grade 3 or 4 Neutropenia.

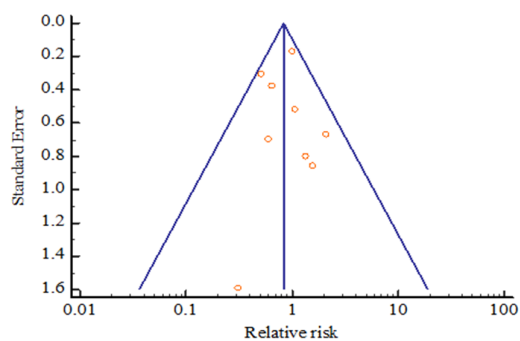

(a)

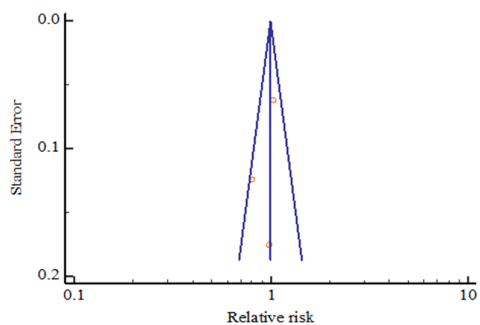

(b)

**Figure S3.** Funnel Plots for Pegfilgrastim versus Filgrastim. **(a).** Febrile Neutropenia; **(b)** Grade 3 or 4 Neutropenia.
